# Supplementary material for: Efficacy and Safety in Proton Therapy and Photon Therapy for Patients With Esophageal Cancer: A Meta-Analysis
Source: PubMed Central journal article supplement (PMC10427943; doi:10.1001/jamanetworkopen.2023.28136), 2023-08-15
Supplement: jamanetwopen-e2328136-s001.pdf [file jamanetwopen-e2328136-s001.pdf]

## Supplemental Online Content

Zhou P, Du Y, Zhang Y, et al. Efficacy and safety in proton therapy and photon therapy for patients with esophageal cancer: a meta-analysis. *JAMA Netw Open*. 2023;6(8):e2328136. doi:10.1001/jamanetworkopen.2023.28136

### **eAppendix.** Literature Search Strategy

**eFigure 1.** Forest Plots of Dose-Volume Parameters for OARs With Proton vs Photon Therapy

**eFigure 2.** Funnel Plot of Dose-Volume Parameters for OARs With Proton vs Photon Therapy ( $\geq 10$  Articles)

**eFigure 3.** Pooled Analysis of pCR (Proton vs Photon Therapy)

**eFigure 4.** Forest Plots of the Incidence of Toxic Effects in the Proton and Photon Therapy Groups (Described as OR)

**eFigure 5.** Example of Single-Rate Pooled Analysis of OS and PFS for Proton Therapy

**eFigure 6.** Single-Rate Pooled Analysis of CR (Proton Therapy)

**eFigure 7.** Single-Rate Pooled Analysis of pCR (Proton Therapy)

**eTable 1.** Detailed Comparison Information on OARs Dosimetric and Planning Quality From Proton and Photon Radiotherapy Planning

**eTable 2.** Results of Quality Assessment Using the Newcastle-Ottawa Scale for Non-RCT Studies (Dosimetric Parameters)

**eTable 3.** Results of Quality Assessment Using the Newcastle-Ottawa Scale for Non-RCT Studies (Efficacy and Safety of Proton vs Photon Therapy)

**eTable 4.** Results of Quality Assessment Using the Cochrane Collaboration's Tool (RCT)

**eTable 5.** Results of Quality Assessment Using the MINORS (Single-Group Tests)

**eTable 6.** Pooled Analysis of Dose-Volume Parameters for OARs with Proton vs Photon Therapy

**eTable 7.** Pooled Analysis of the Incidence of Toxic Effects in the Proton and Photon Therapy Group (Described as OR)

**eTable 8.** Single-Rate Pooled Analysis for the Incidence of Toxic Effects in Proton Therapy

This supplemental material has been provided by the authors to give readers additional information about their work.

## eAppendix. Literature Search Strategy

### PubMed

- #1. "Esophageal Neoplasms"[Mesh]
- #2. ((((((((((((((Esophageal Neoplasm) OR (Neoplasm, Esophageal)) OR (Esophagus Neoplasm)) OR (Esophagus Neoplasms)) OR (Neoplasm, Esophagus)) OR (Neoplasms, Esophagus)) OR (Neoplasms, Esophageal)) OR (Cancer of Esophagus)) OR (Cancer of the Esophagus)) OR (Esophagus Cancer)) OR (Cancer, Esophagus)) OR (Cancers, Esophagus)) OR (Esophagus Cancers)) OR (Esophageal Cancer)) OR (Cancer, Esophageal)) OR (Cancers, Esophageal)) OR (Esophageal Cancers)
- #3. #1 OR #2
- #4. "Proton Therapy"[Mesh]
- #5. ((((((((((Proton Therapies) OR (Therapies, Proton)) OR (Therapy, Proton)) OR (Proton Beam Therapy)) OR (Proton Beam Therapies)) OR (Therapies, Proton Beam)) OR (Therapy, Proton Beam)) OR (Proton Beam Radiation Therapy)
- #6. #4 OR #5
- #7. #3 AND #6

### Embase

- #1. 'esophagus cancer'/exp
- #2. 'esophag\* neoplasm\*' OR 'neoplasm\*, esophag\*' OR 'cancer of esophag\*' OR 'esophag\* cancer\*' OR 'cancer\*, esophag\*' OR 'cancer\* of the esophag\*'
- #3. #1 OR #2
- #4. 'proton therapy'/exp
- #5. 'proton therap\*' OR 'therap\*, proton' OR 'proton beam therap\*' OR 'therap\*, proton beam' OR 'proton beam radiation therap\*'
- #6. #4 OR #5
- #7. #3 AND #6

### Cochrane

- #1. MeSH descriptor: [Esophageal Neoplasms] explode all trees
- #2. ('esophag\* neoplasm\*' OR 'neoplasm\*, esophag\*' OR 'cancer of esophag\*' OR 'esophag\* cancer\*' OR 'cancer\*, esophag\*' OR 'cancer\* of the esophag\*'):ti,ab,kw
- #3. #1 OR #2
- #4. MeSH descriptor: [Proton Therapy] explode all trees
- #5. ('proton therap\*' OR 'therap\*, proton' OR 'proton beam therap\*' OR 'therap\*, proton beam' OR 'proton beam radiation therap\*'):ti,ab,kw
- #6. #4 OR #5
- #8. #3 AND #6

Web of science

#1. TS= esophag\*

#2. TS= (cancer\* OR tumor\* OR neoplasm\*)

#3. #1 AND #2

#4. TS= (proton therap\*) OR (therap\*, proton) OR (proton beam therap\*) OR (therap\*, proton beam) OR (proton beam radiation therap\*)

#5. #3 AND #4

TS=Topic            Search in: Web of Science Core Collection.

Link:

<https://www.webofscience.com/wos/woscc/summary/ae4b2cf6-c13f-48e9-949a-0ea1fb714582-6e1f3b8e/relevance/1>

Sinomed

#1. "食管肿瘤"[全部字段:智能] OR "食管癌"[全部字段:智能] OR "食道肿瘤"[全部字段:智能] OR "食道癌"[全部字段:智能]

#2. "质子治疗"[全部字段:智能] OR "质子放疗"[全部字段:智能] OR "质子"[全部字段:智能]

#3. #1 AND #2

CNKI

(TKA % '食管肿瘤' OR TKA % '食管癌' OR TKA % '食道肿瘤' OR TKA % '食道癌') AND (TKA % '质子治疗' OR TKA % '质子' OR TKA % '质子放疗')

TKA: 篇文摘; %: 模糊检索

**eFigure 1.** Forest Plots of Dose-Volume Parameters for OARs With Proton vs Photon Therapy

a) Lung- $D_{mean}$

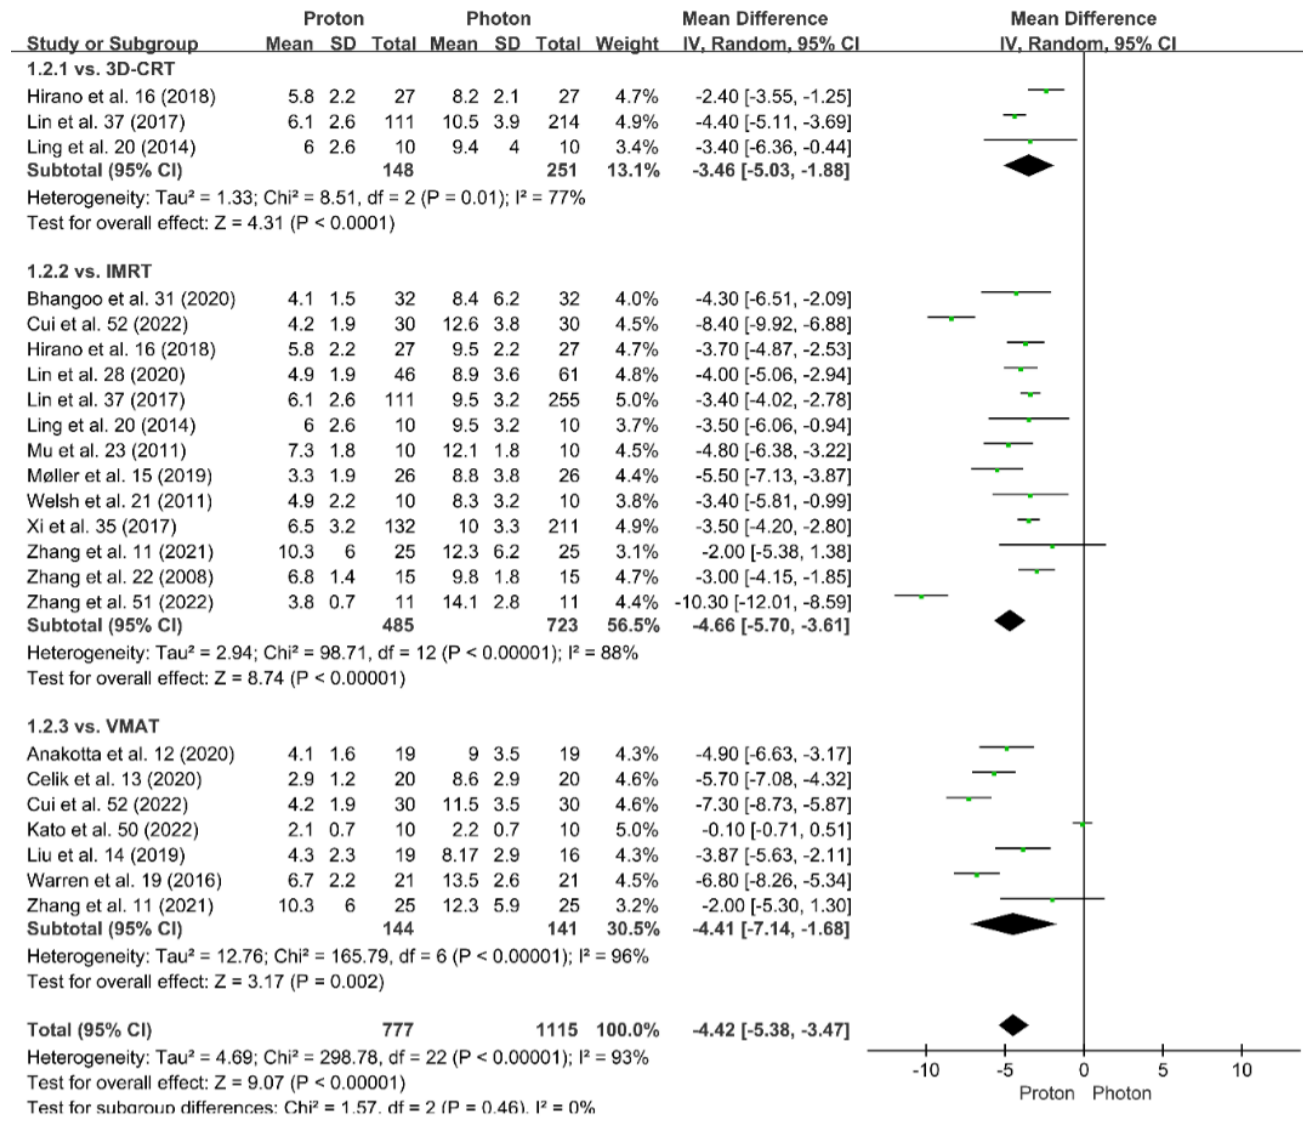

b) Lung- $V_5$

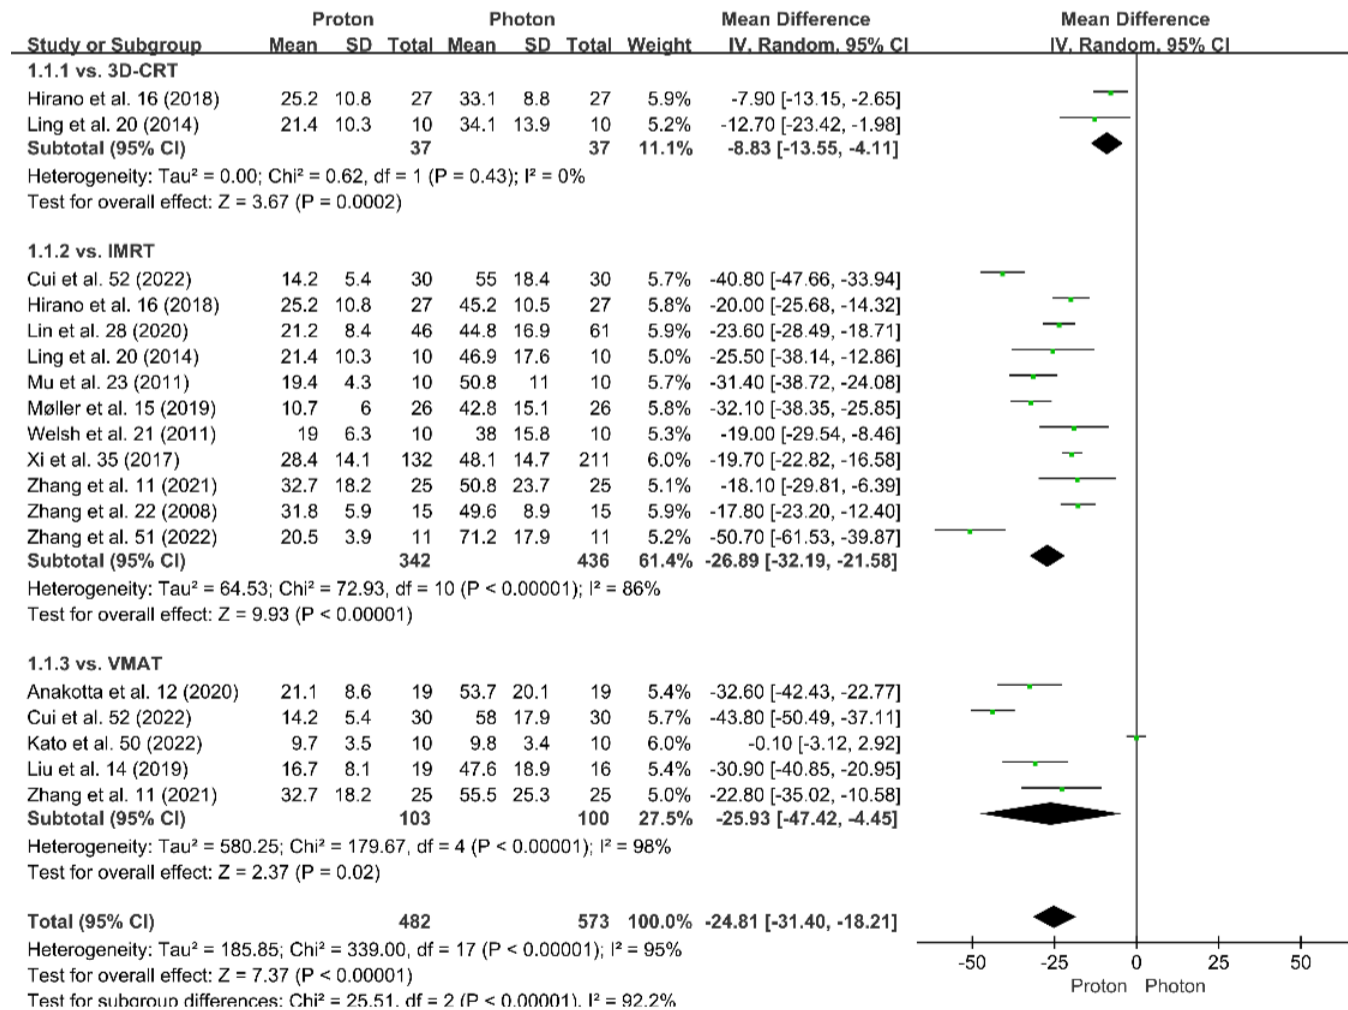

c) Lung-V<sub>10</sub>

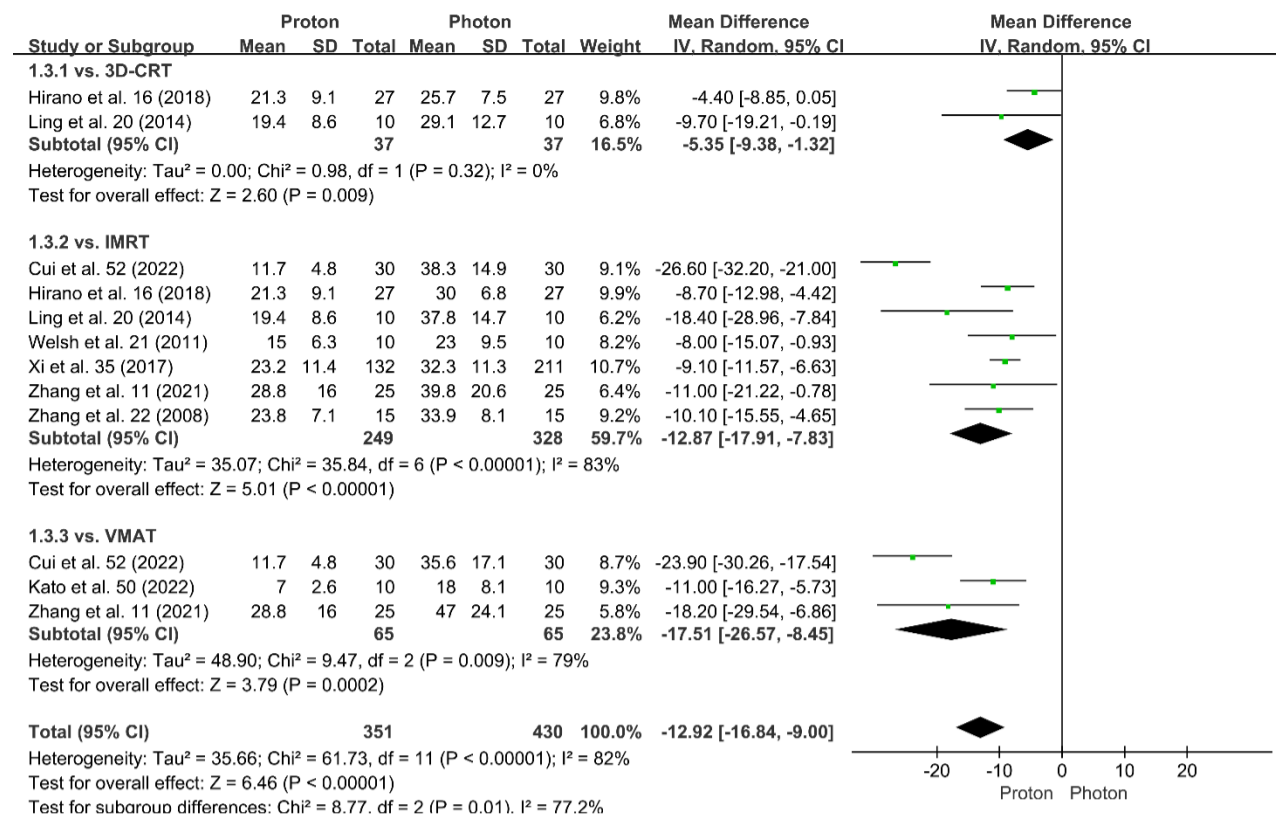

d) Lung-V<sub>20</sub>

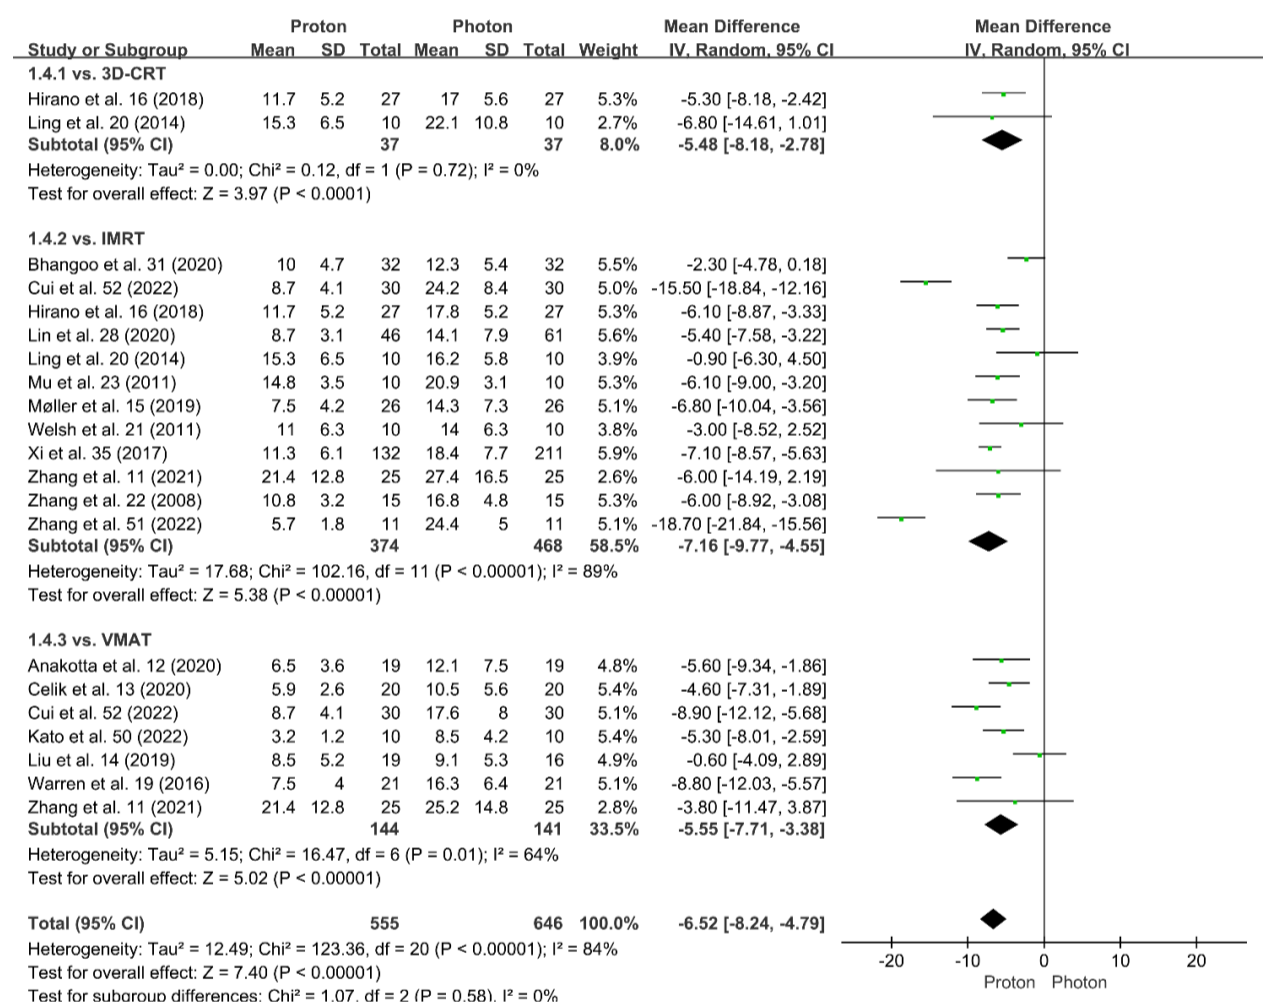

e) Lung-V<sub>30</sub>

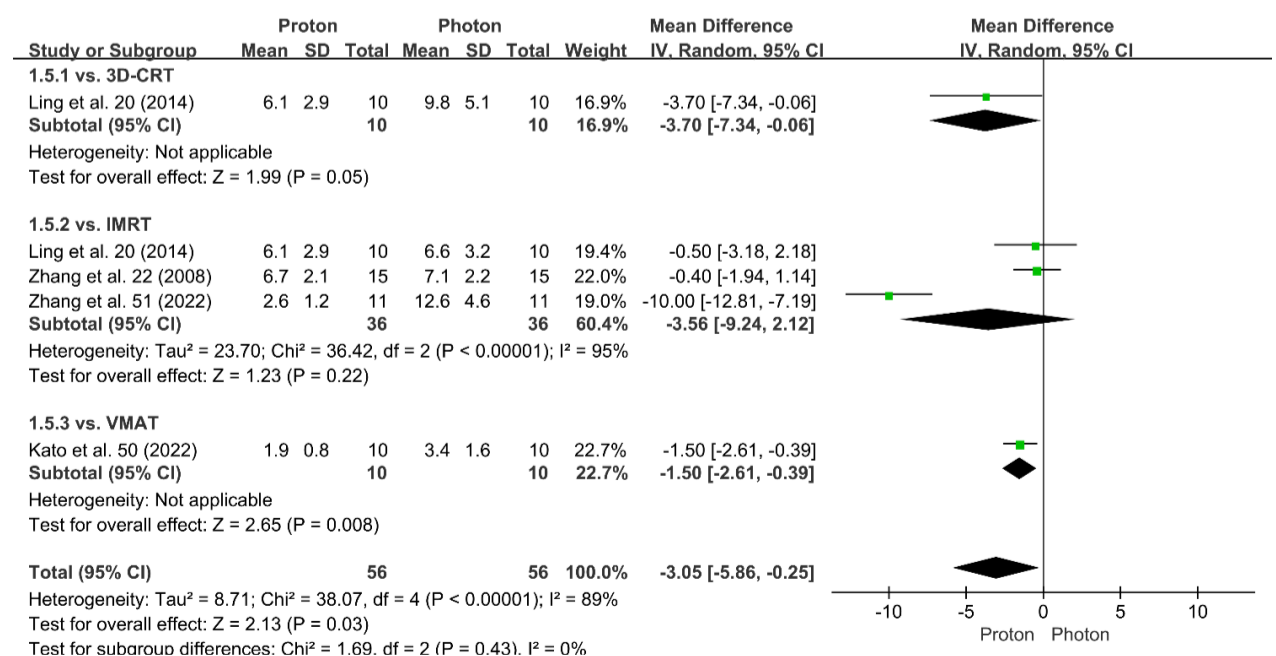

f) Lung-V<sub>40</sub>

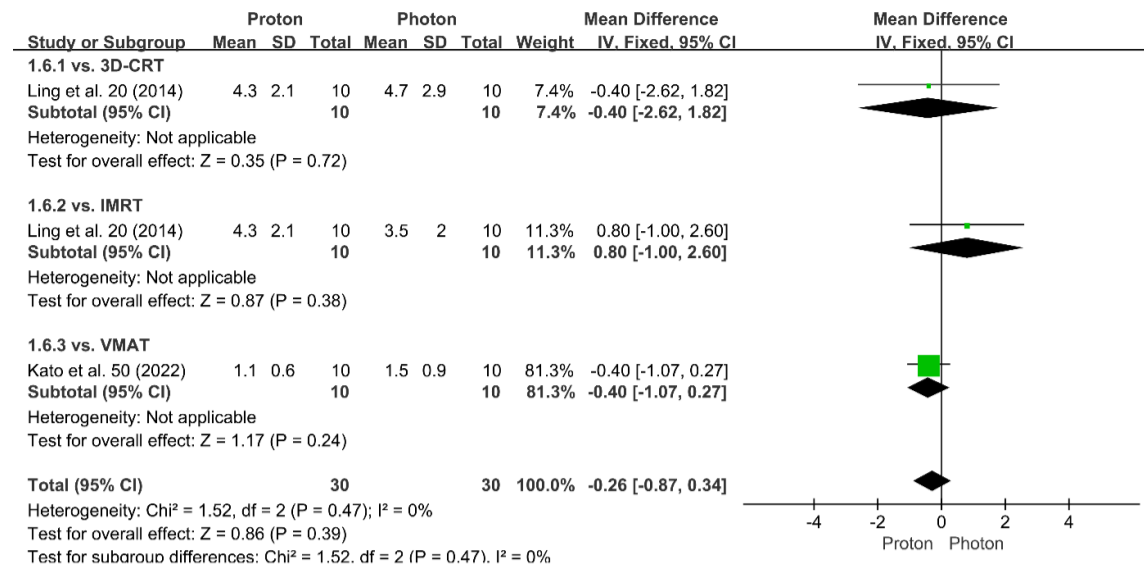

g) Heart-MLD

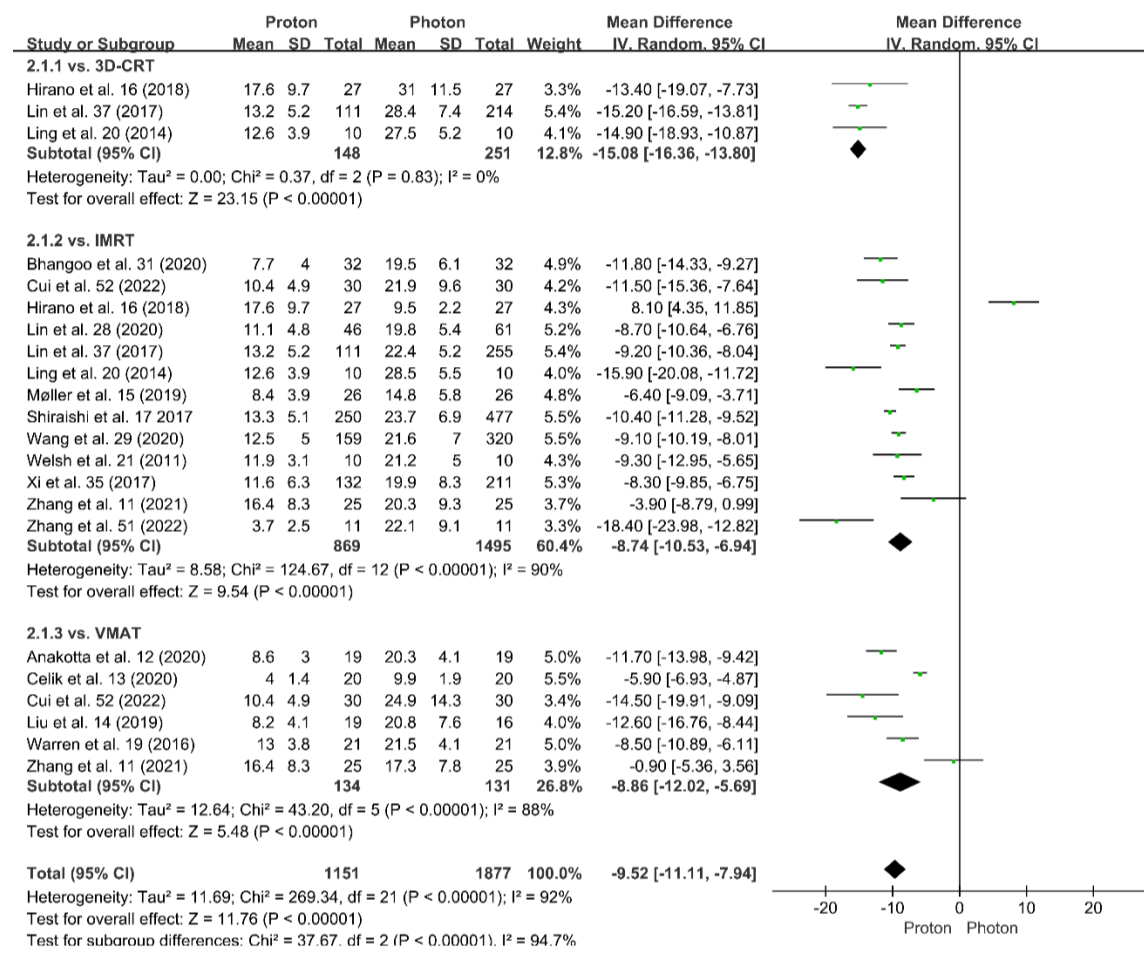

h) Heart-V<sub>5</sub>

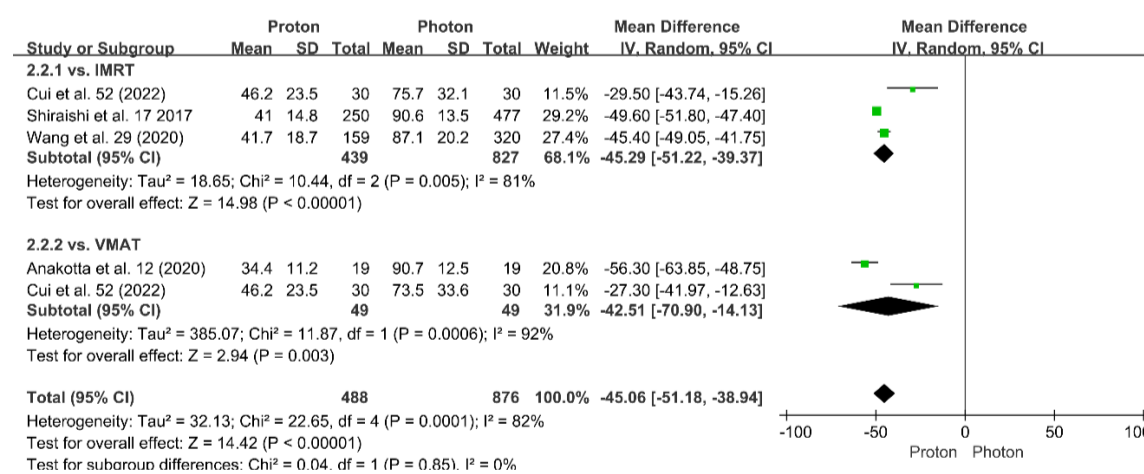

i) Heart-V<sub>10</sub>

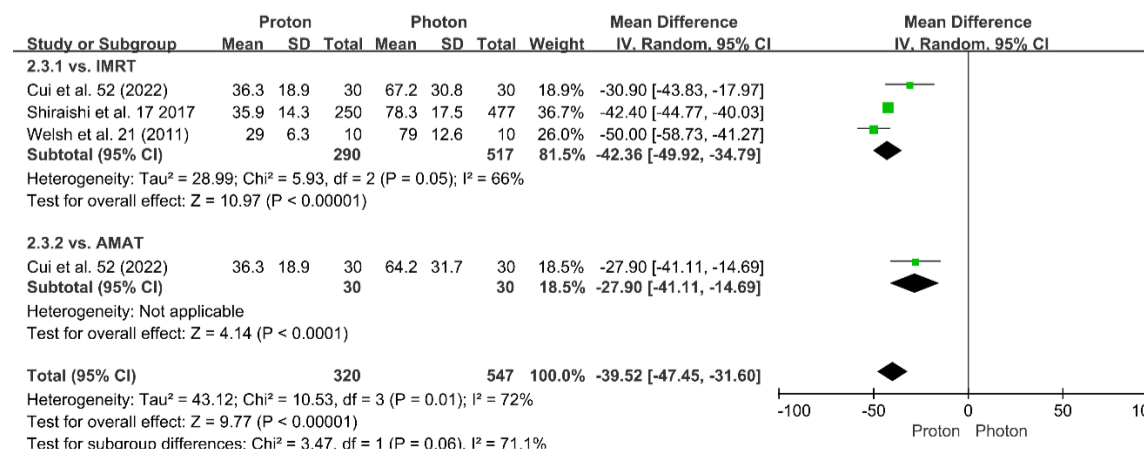

j) Heart-V<sub>20</sub>

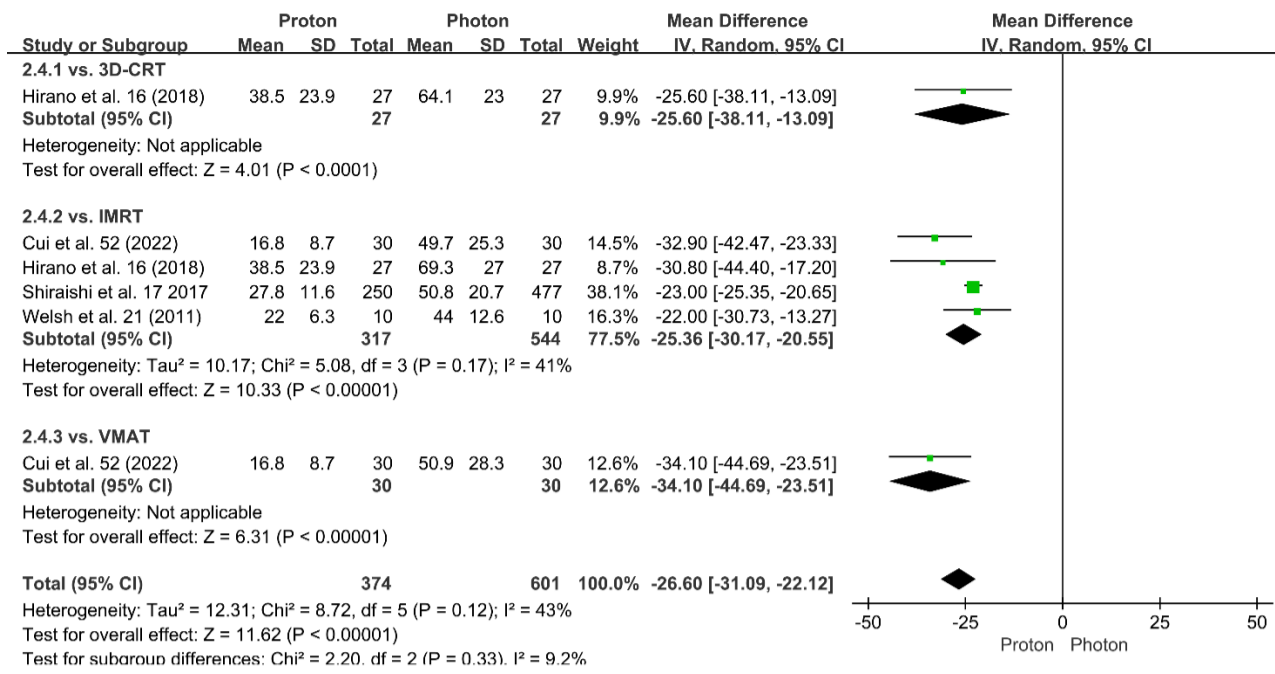

k) Heart-V<sub>30</sub>

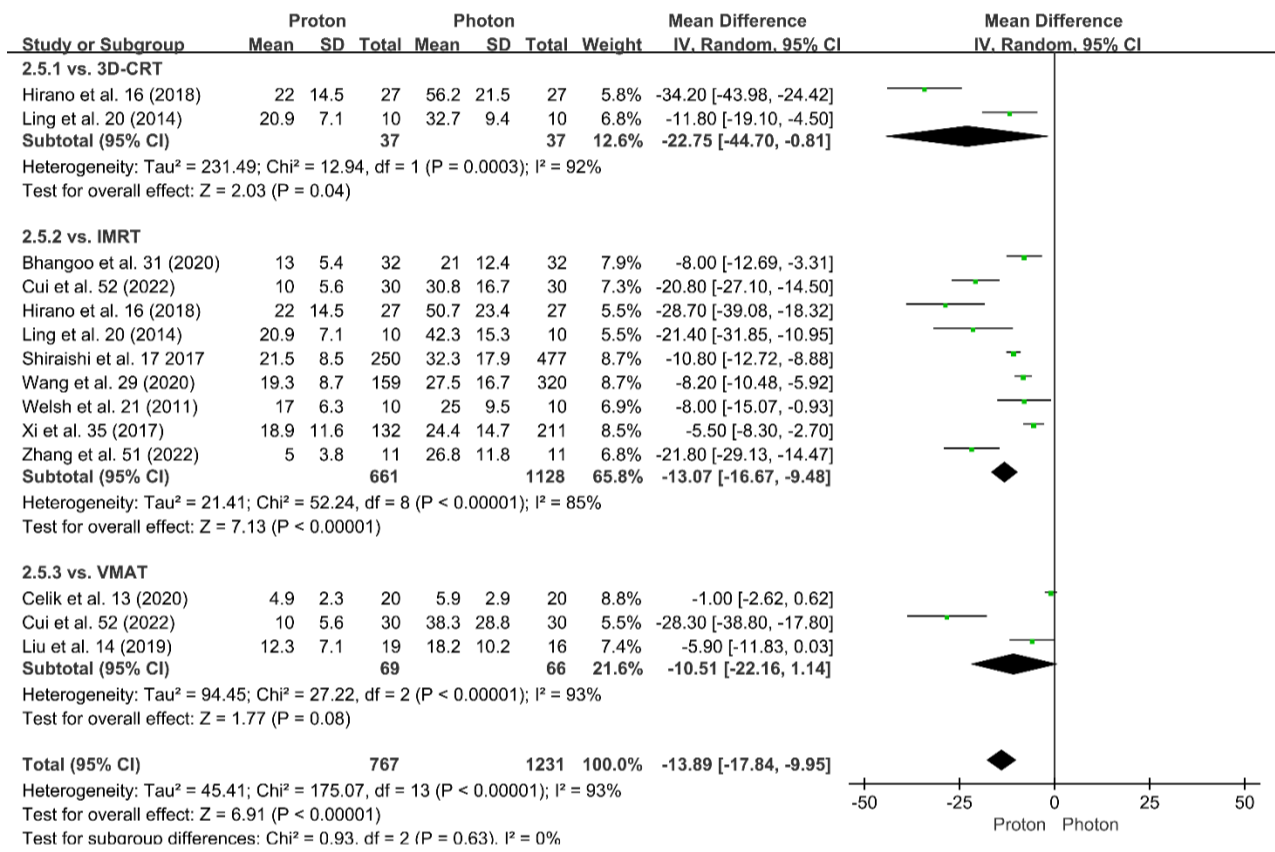

l) Heart-V<sub>40</sub>

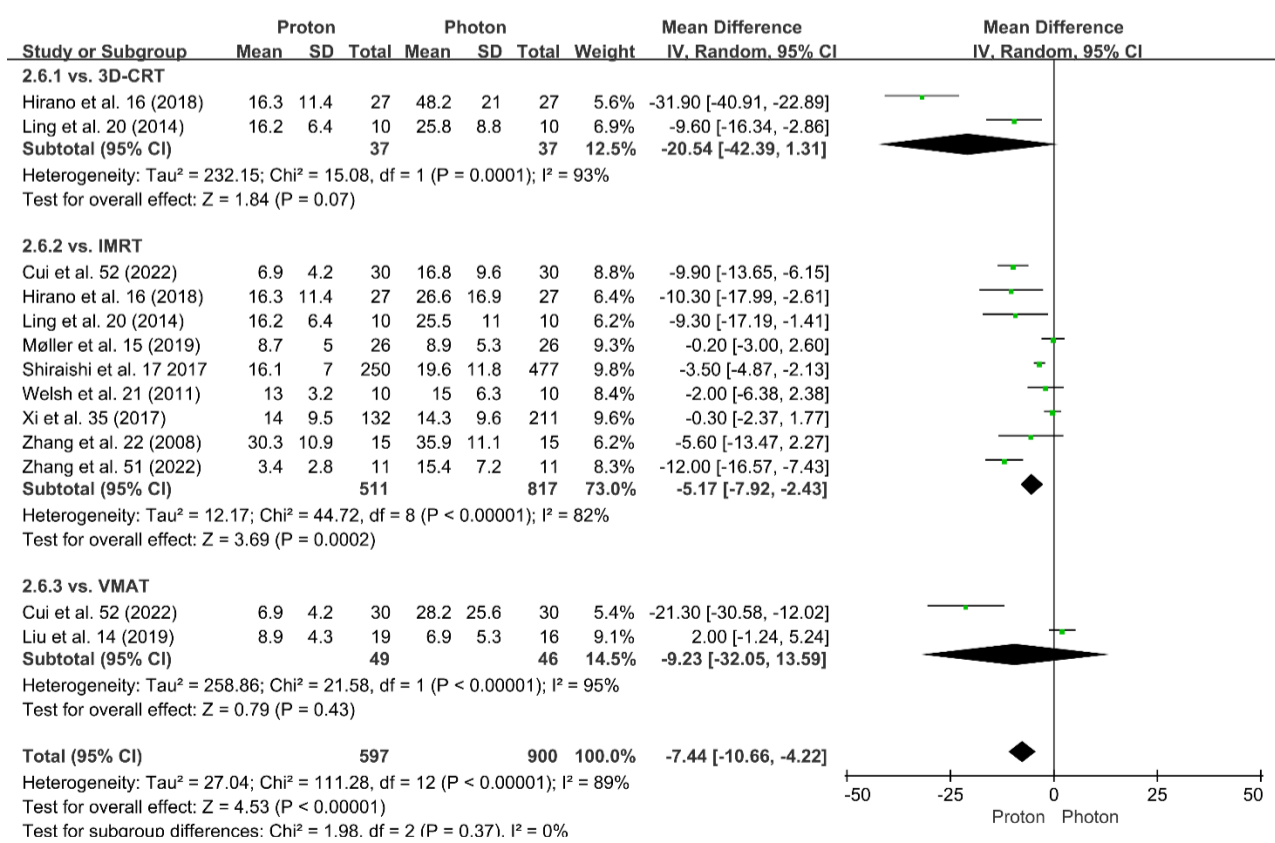

m) Heart-V<sub>50</sub>

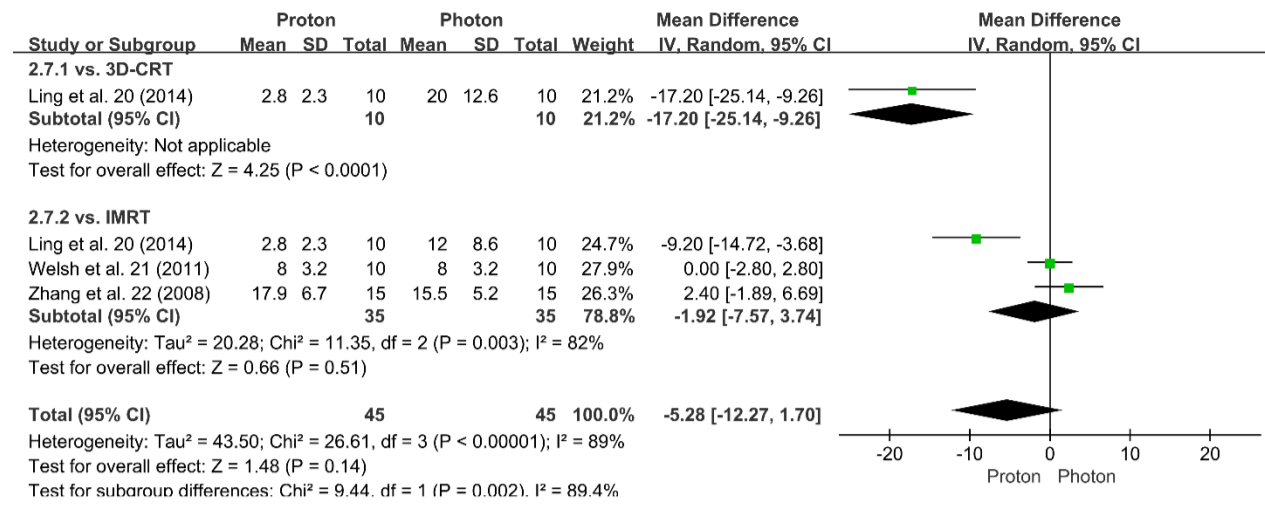

n) Left ventricle (LV)-D<sub>mean</sub>

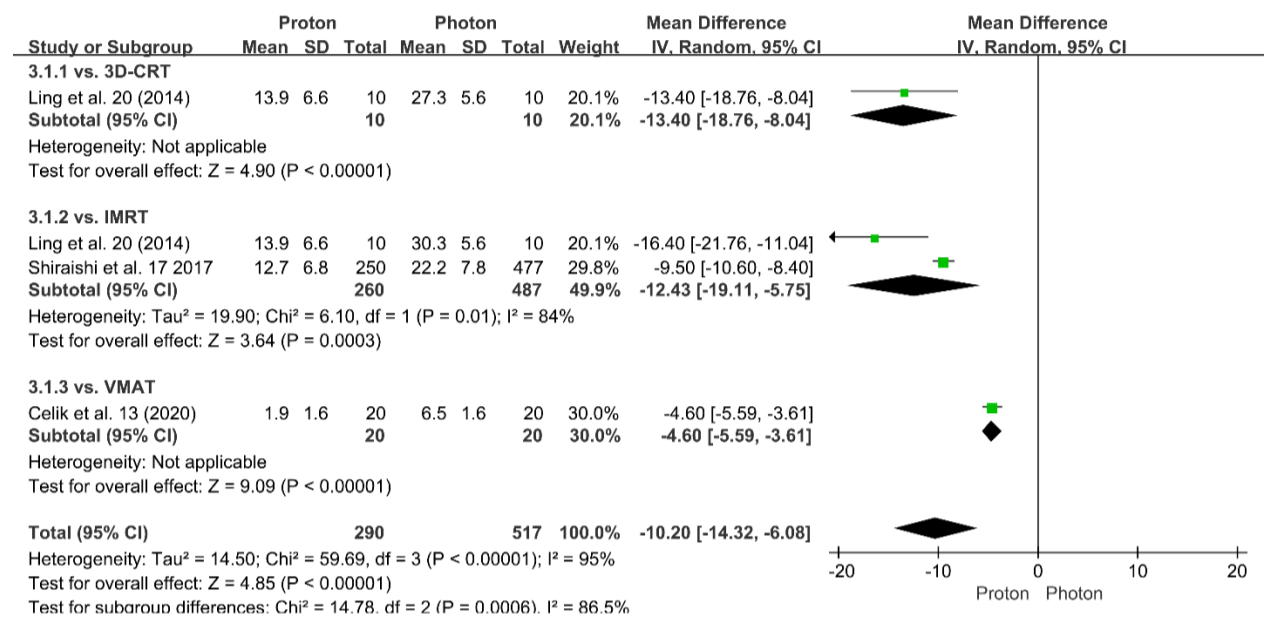

o) Left anterior descending artery (LAD)-D<sub>mean</sub>

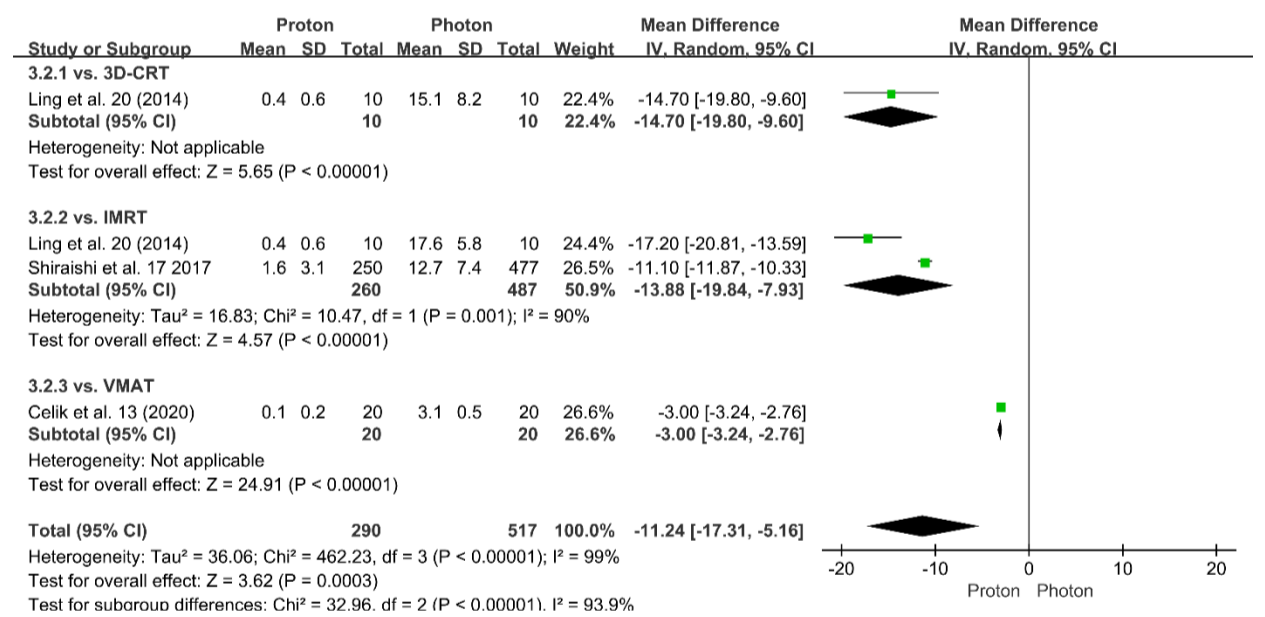

p) BM-D<sub>mean</sub>

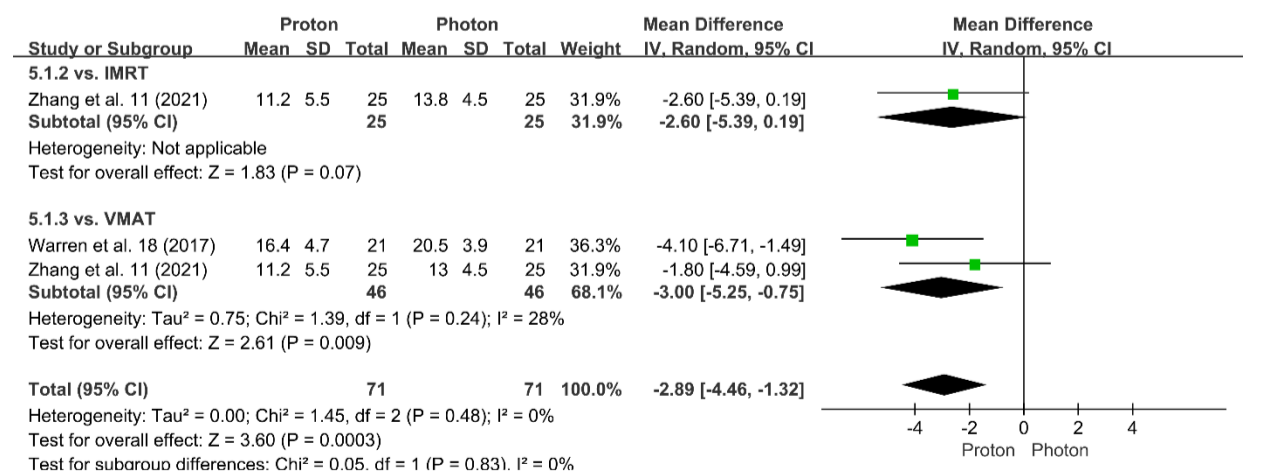

q) BM-V<sub>10</sub>



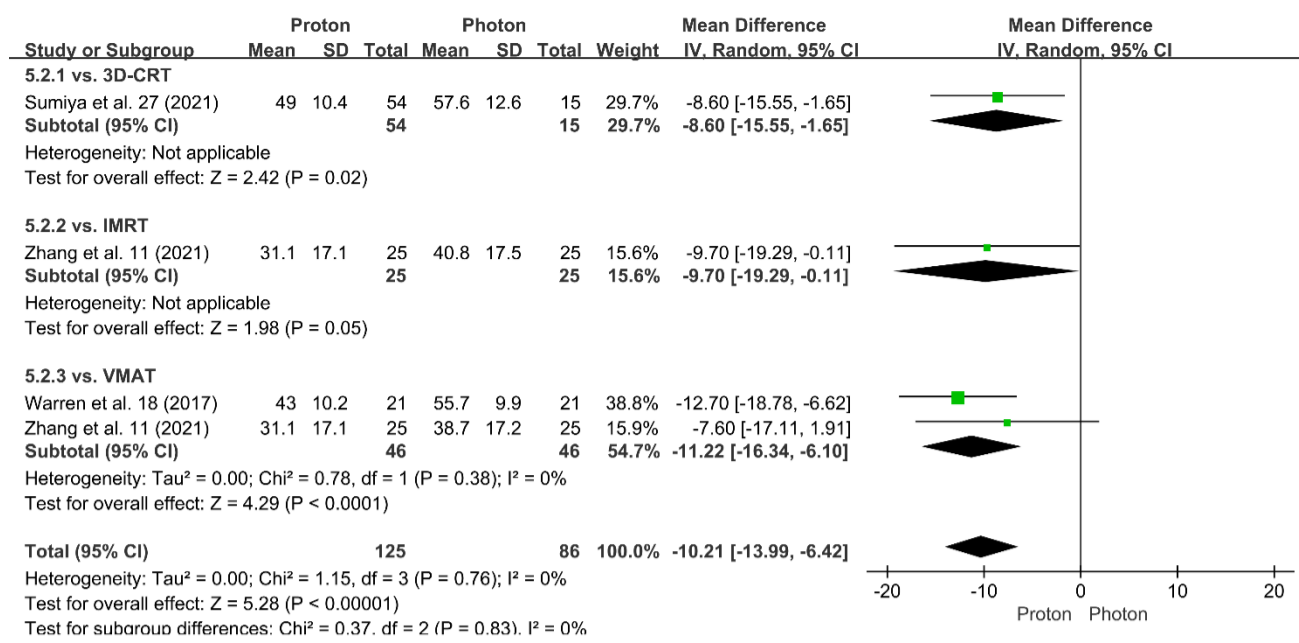

r) BM-V<sub>20</sub>

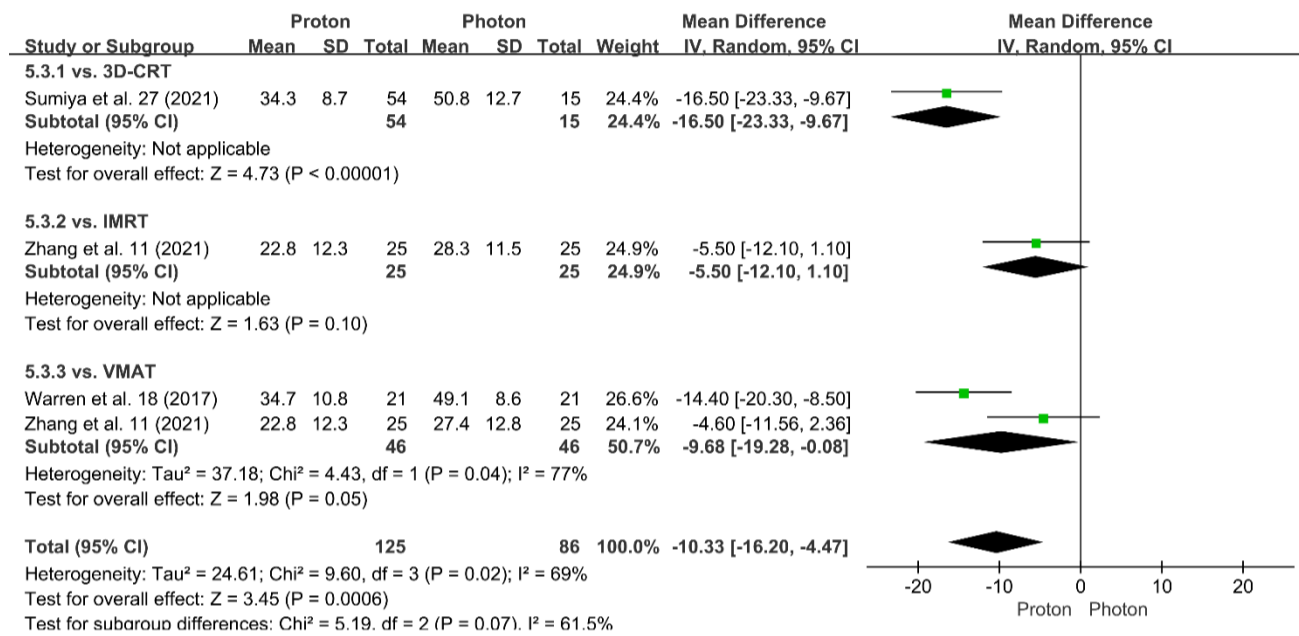

s) SC-D<sub>max</sub>

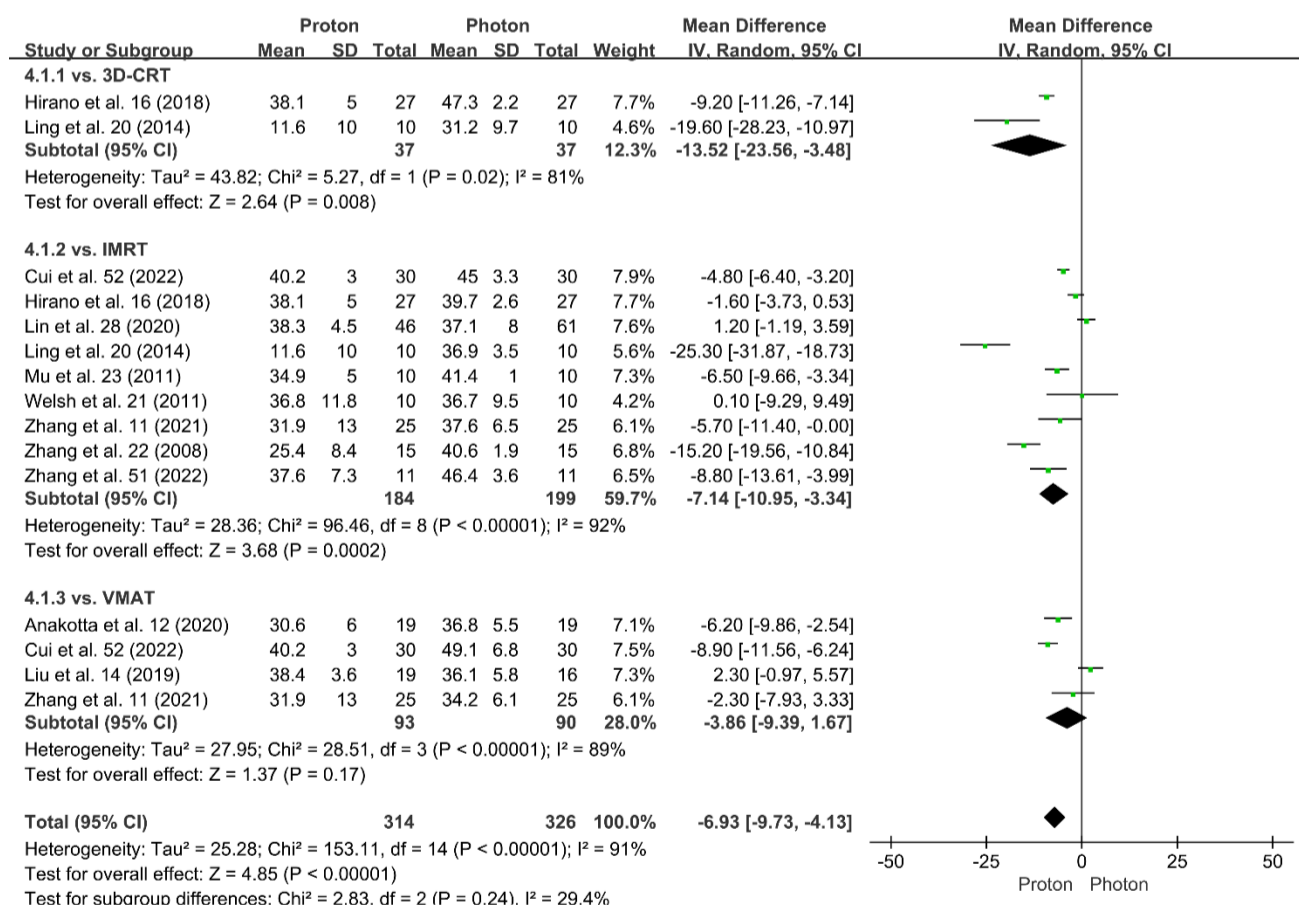

**eFigure 2.** Funnel Plot of Dose-Volume Parameters for OARs with Proton vs Photon Therapy (≥10 Articles)

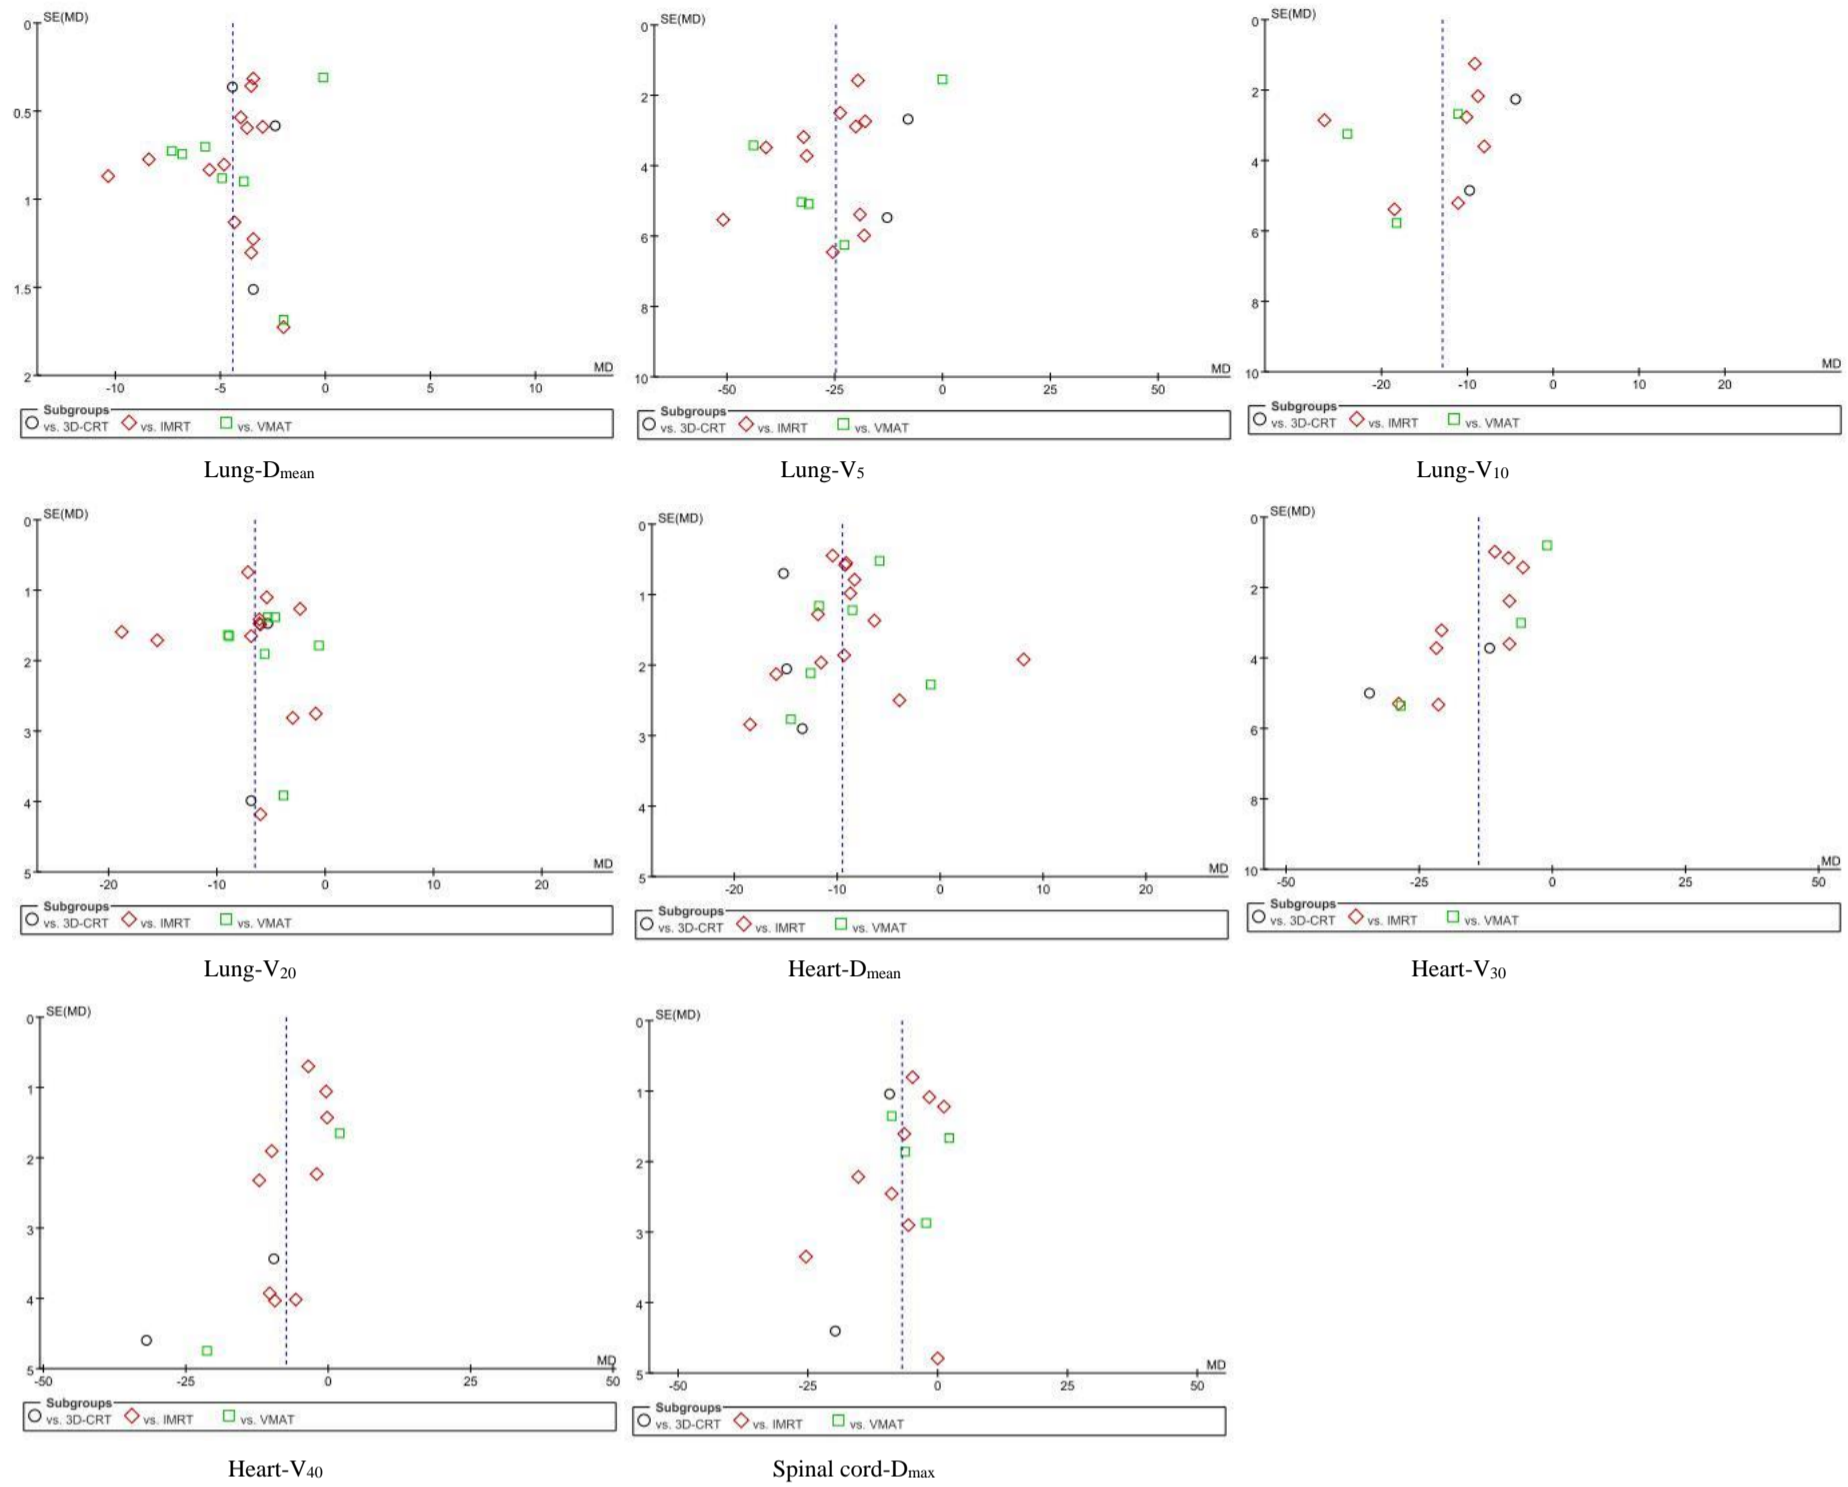

**eFigure 3.** Pooled Analysis of pCR (Proton vs Photon Therapy)

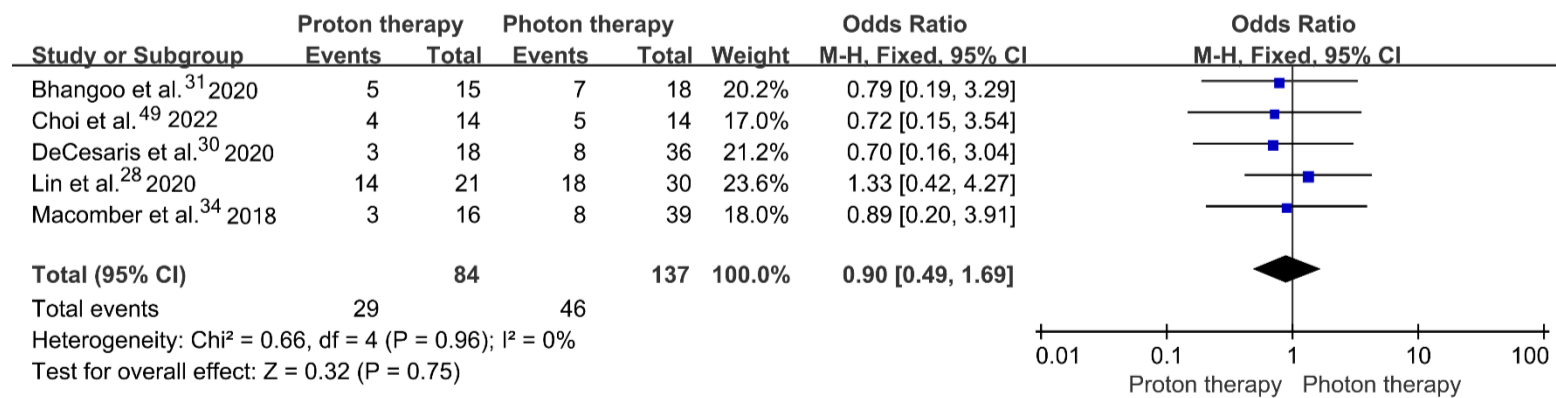

**eFigure 4.** Forest Plots of the Incidence of Toxic Effects in the Proton and Photon Therapy Groups (Described as

a) G2+ RE

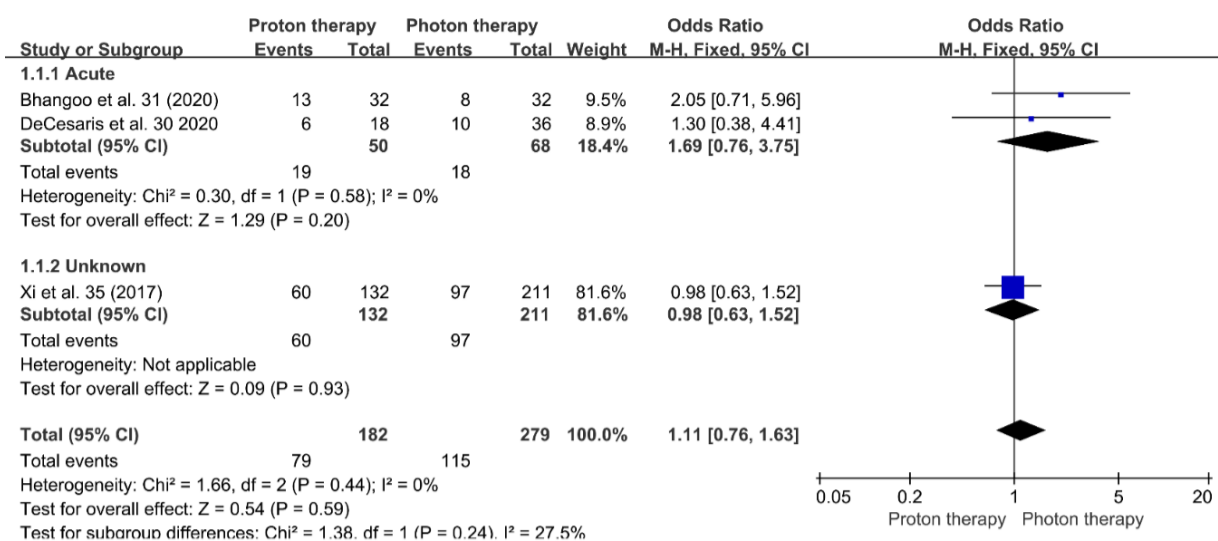

b) G2+ RP

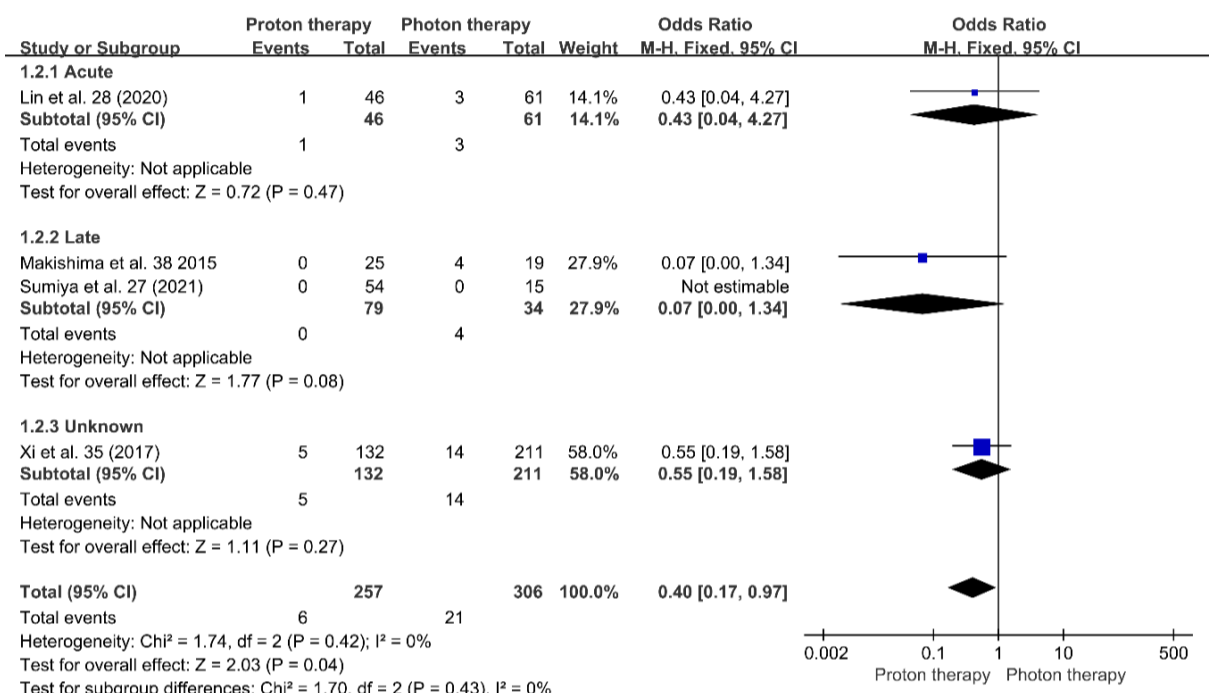

c) G2+ PE

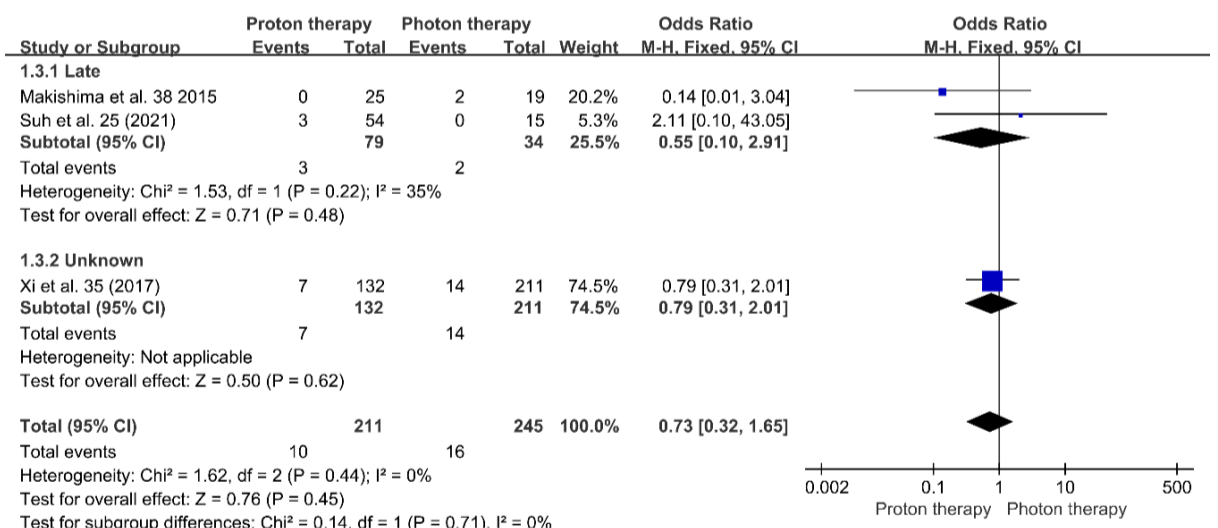

d) G2+ PCE

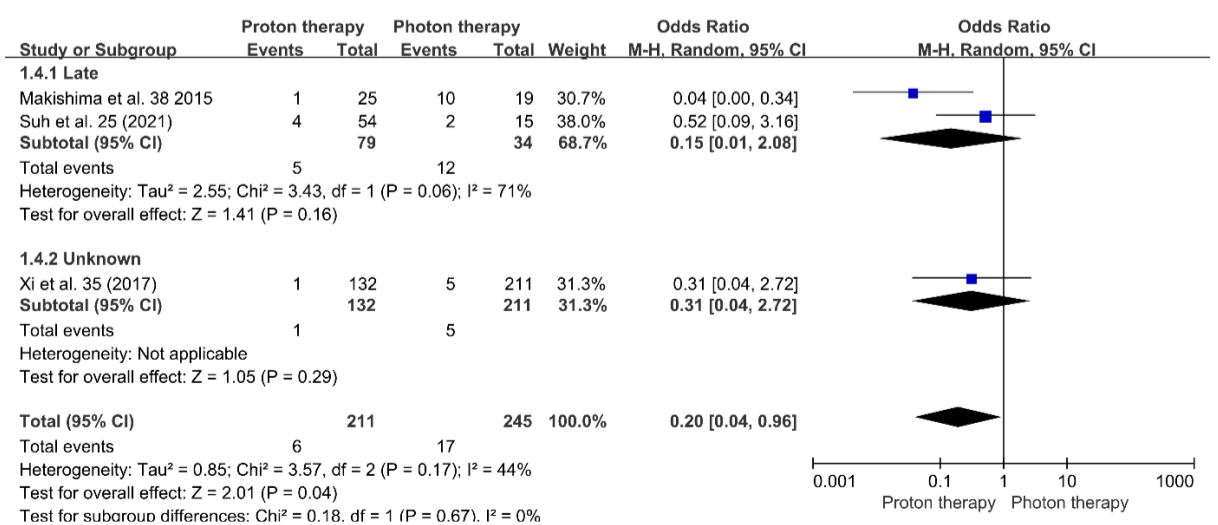

e) G3+ RE

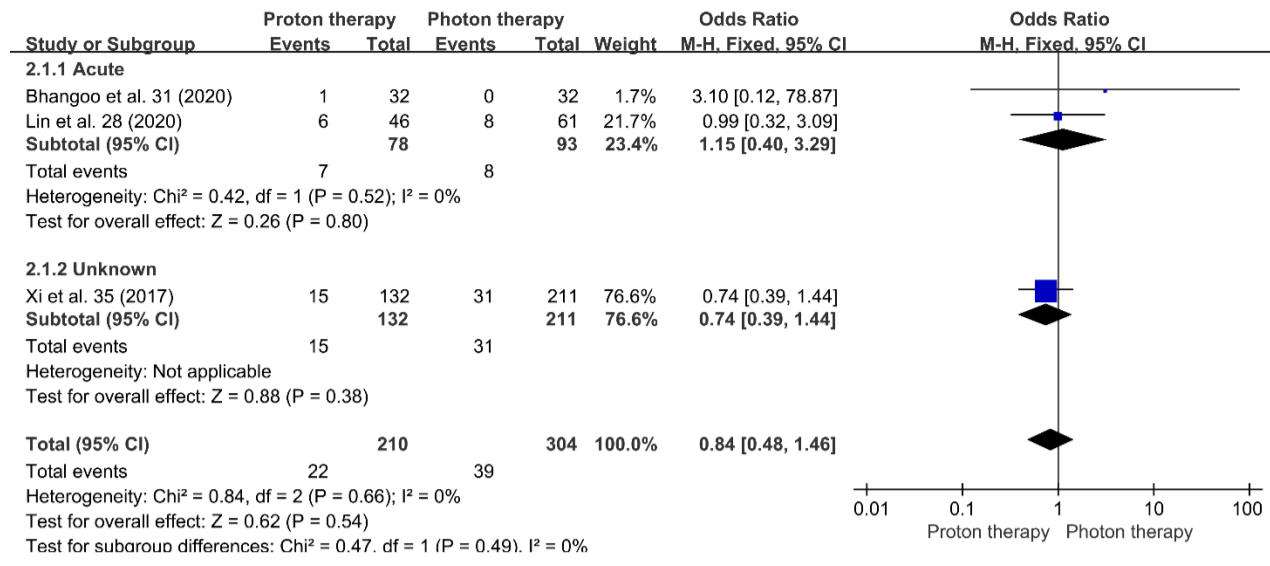

f) G3+ RP

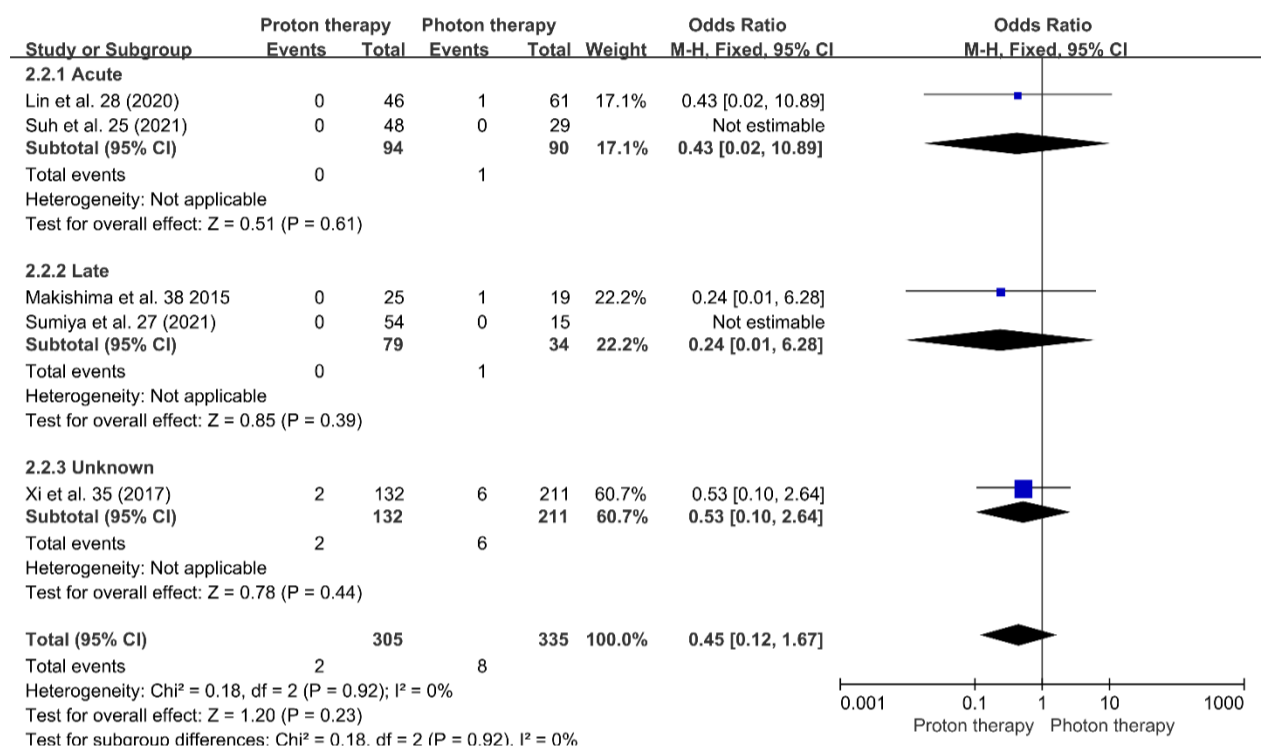

g) G3+ PE

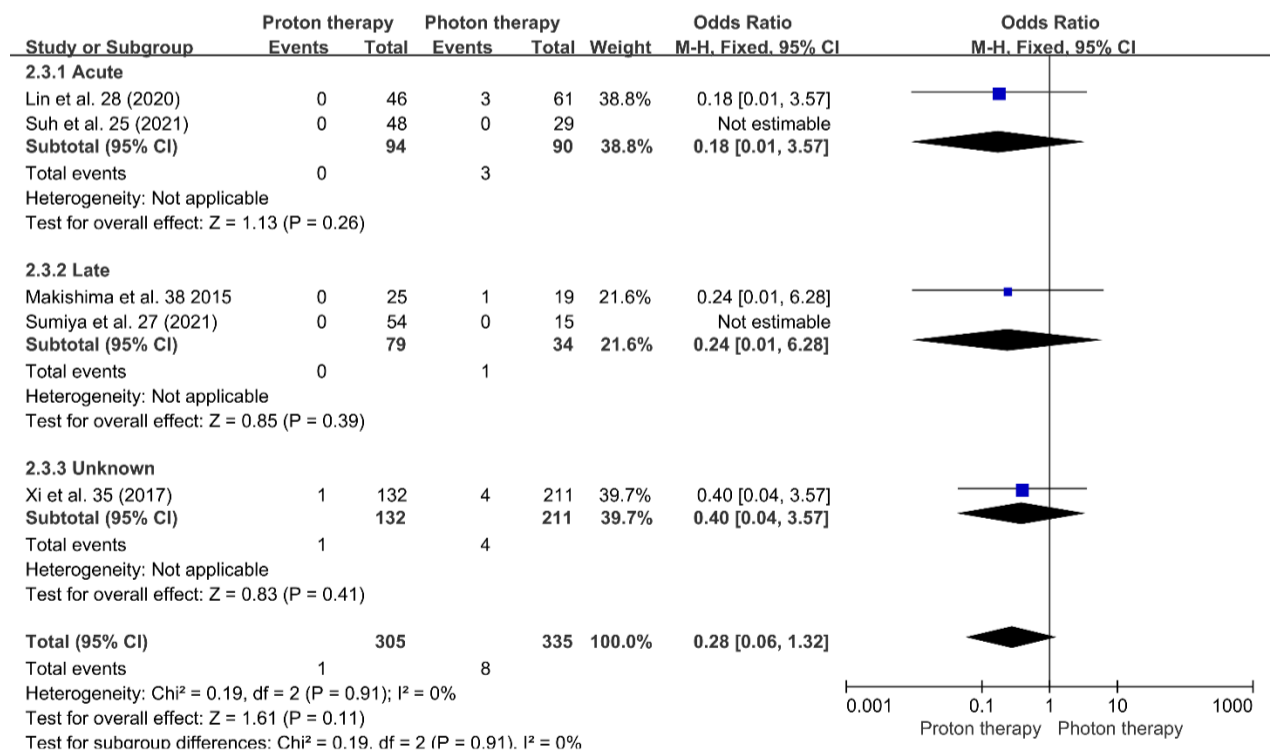

h) G3+ PCE

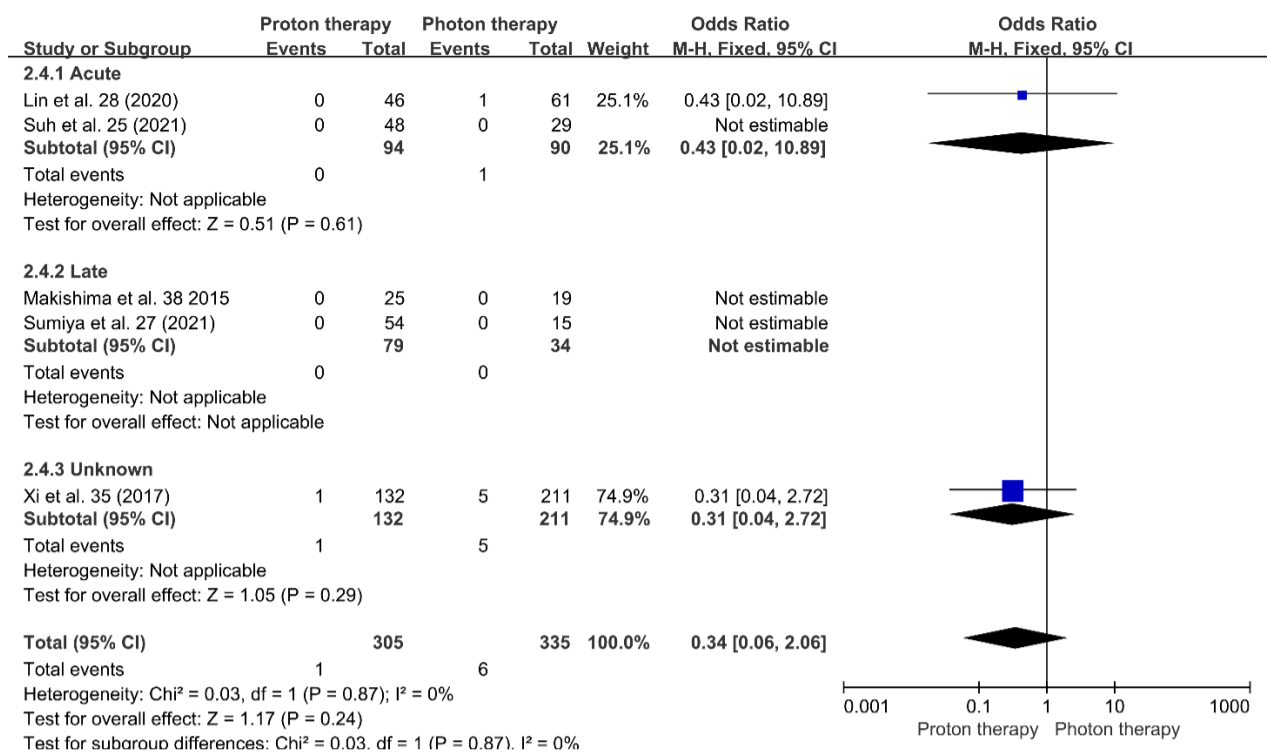

i) G4+ lymphocytopenia

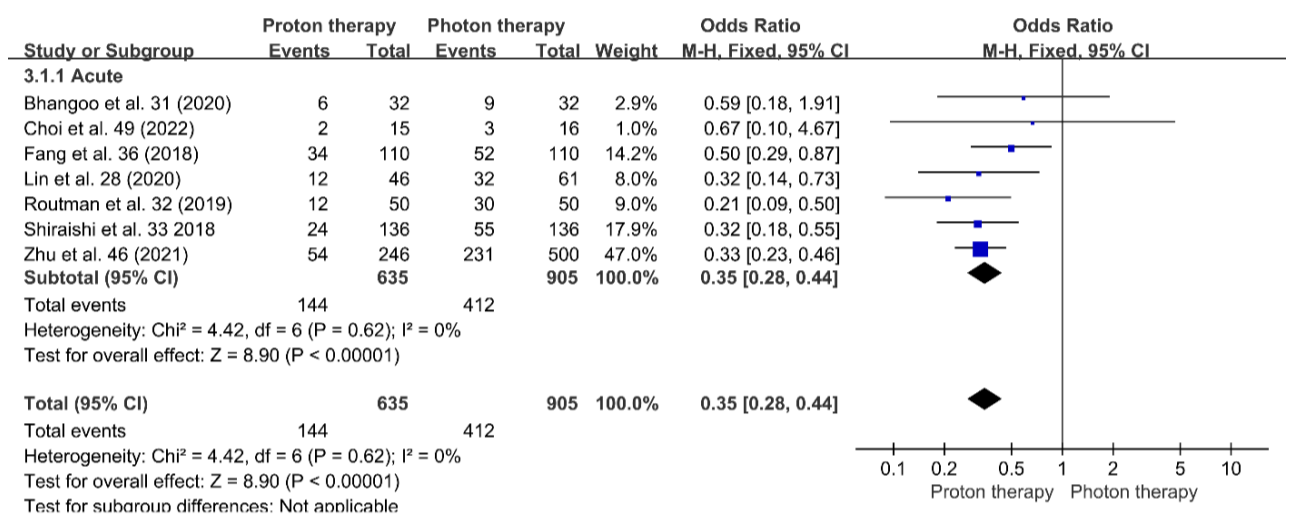

**eFigure 5.** Example of Single-Rate Pooled Analysis of OS and PFS for Proton Therapy

A/B: 2y-OS; C/D: 2y-PFS; A/C: sub-group by treatment modalities (neoadjuvant, racial, or mixed); B/D: sub-group by stage (III-IV < 50% or ≥ 50%).

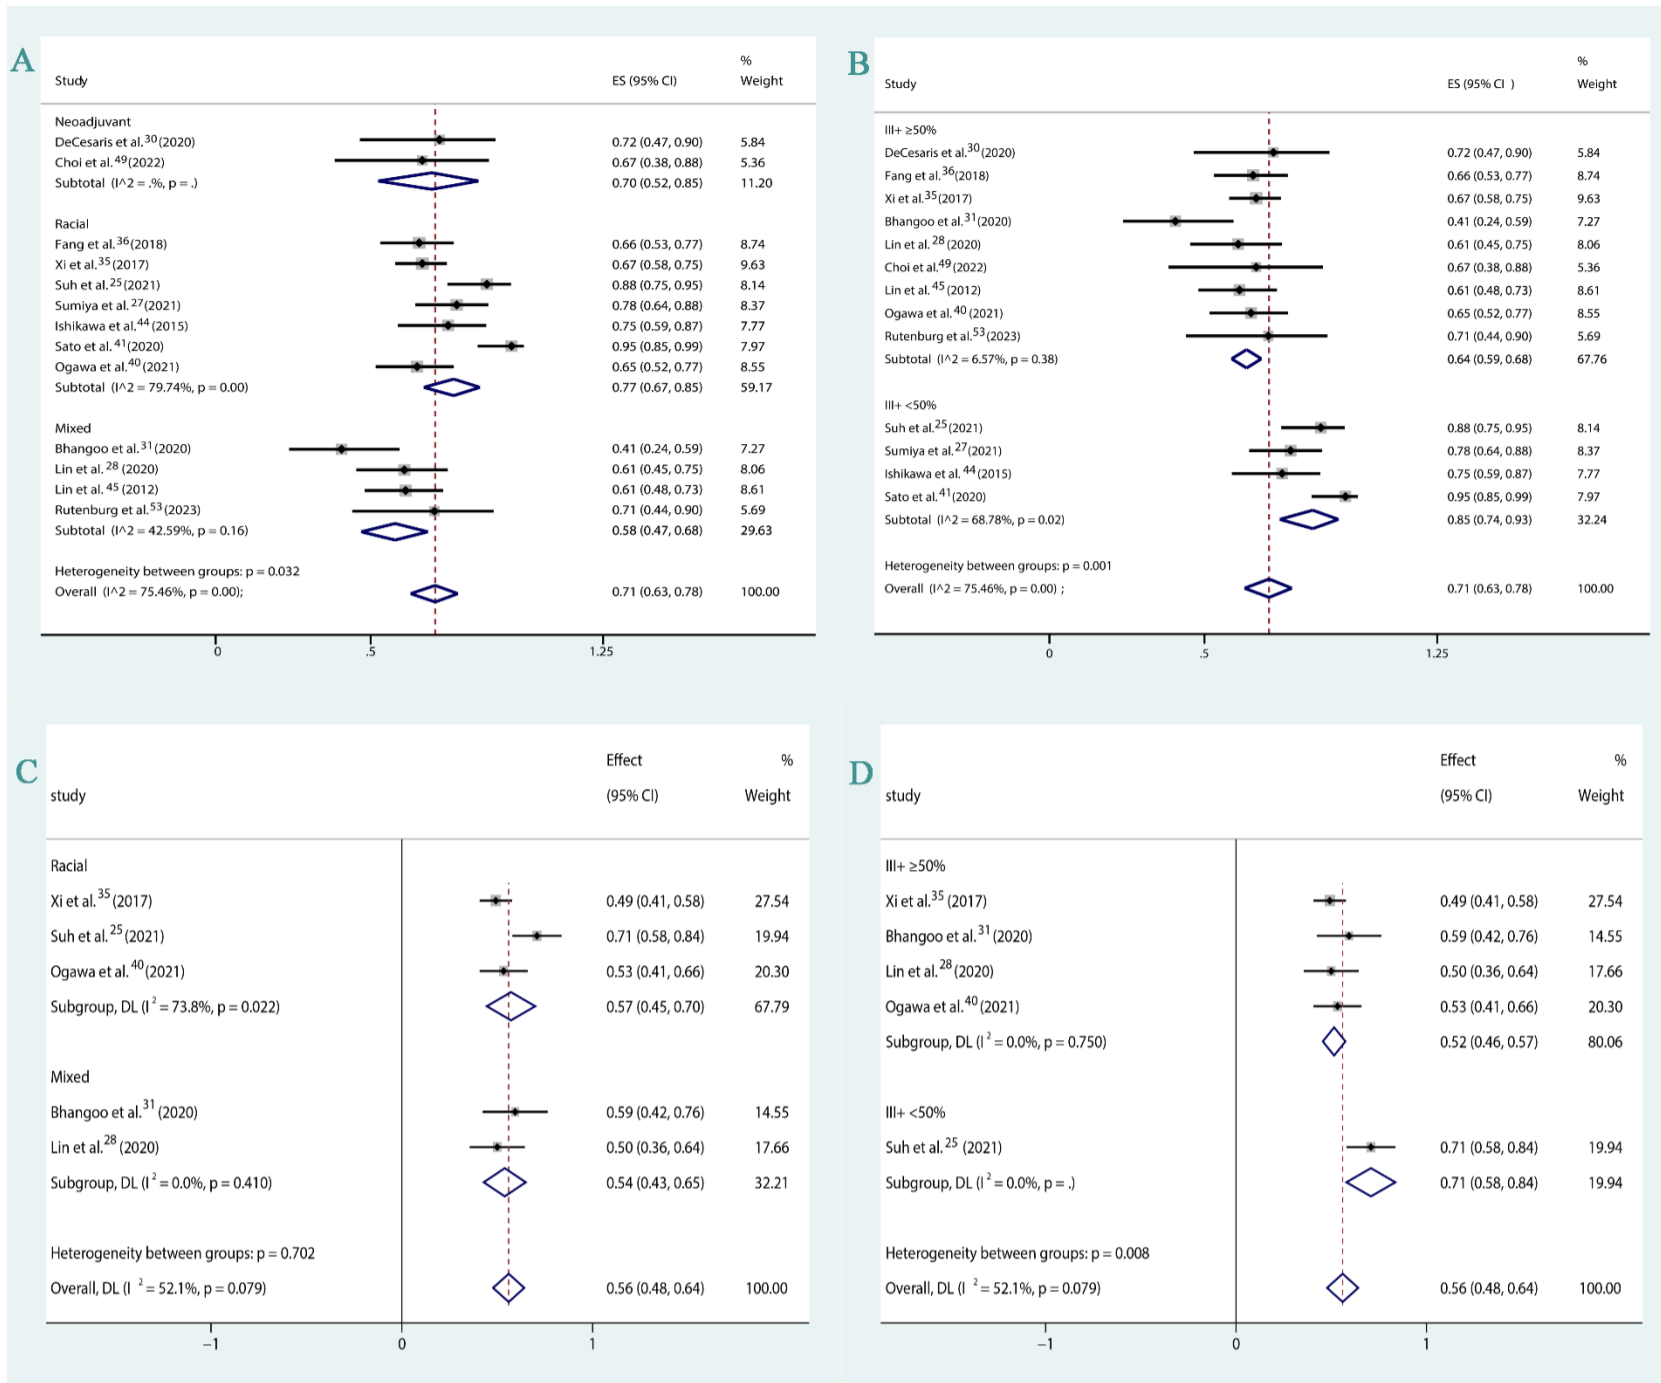

**eFigure 6.** Single-Rate Pooled Analysis of CR (Proton Therapy)

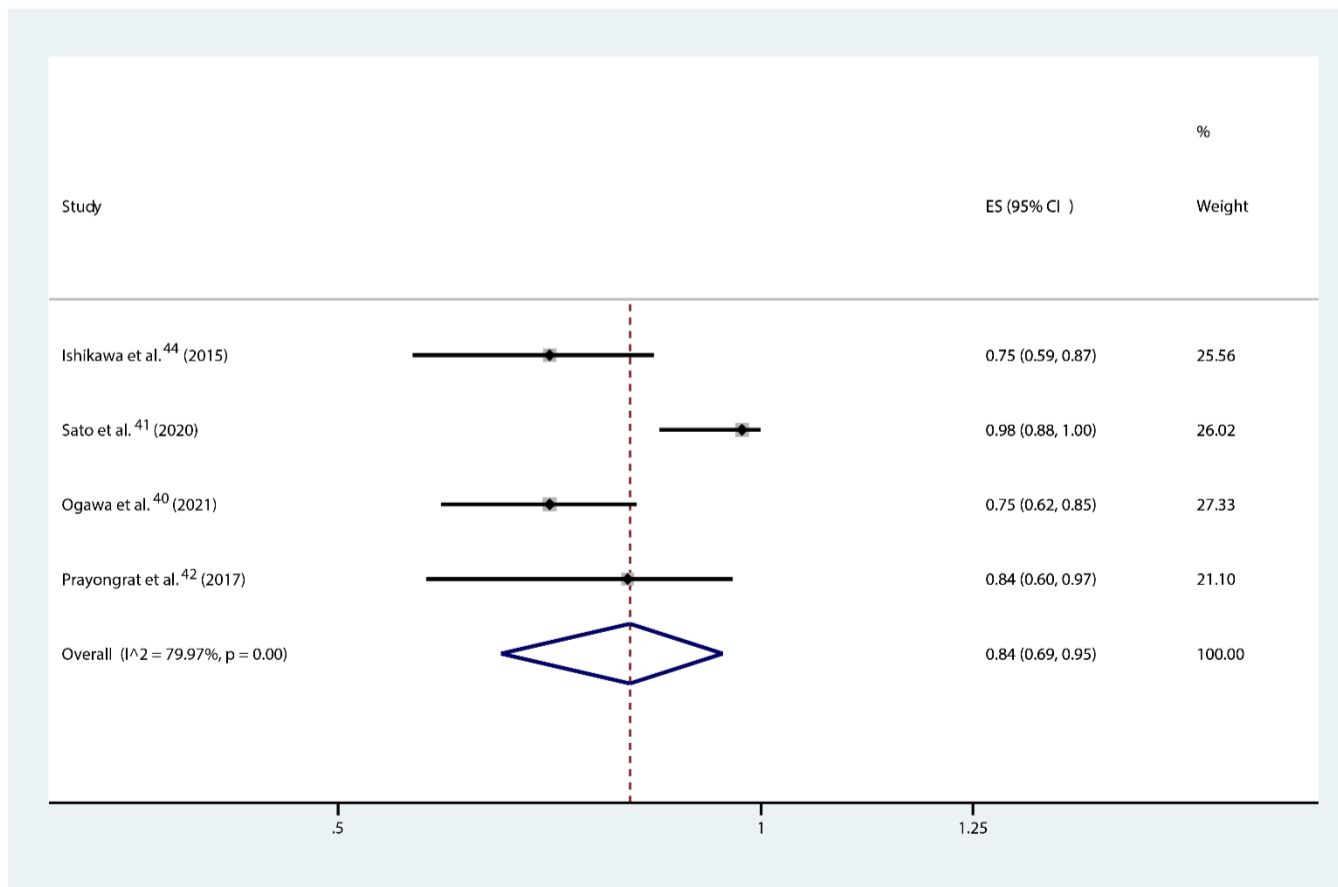

**eFigure 7.** Single-Rate Pooled Analysis of pCR (Proton Therapy)

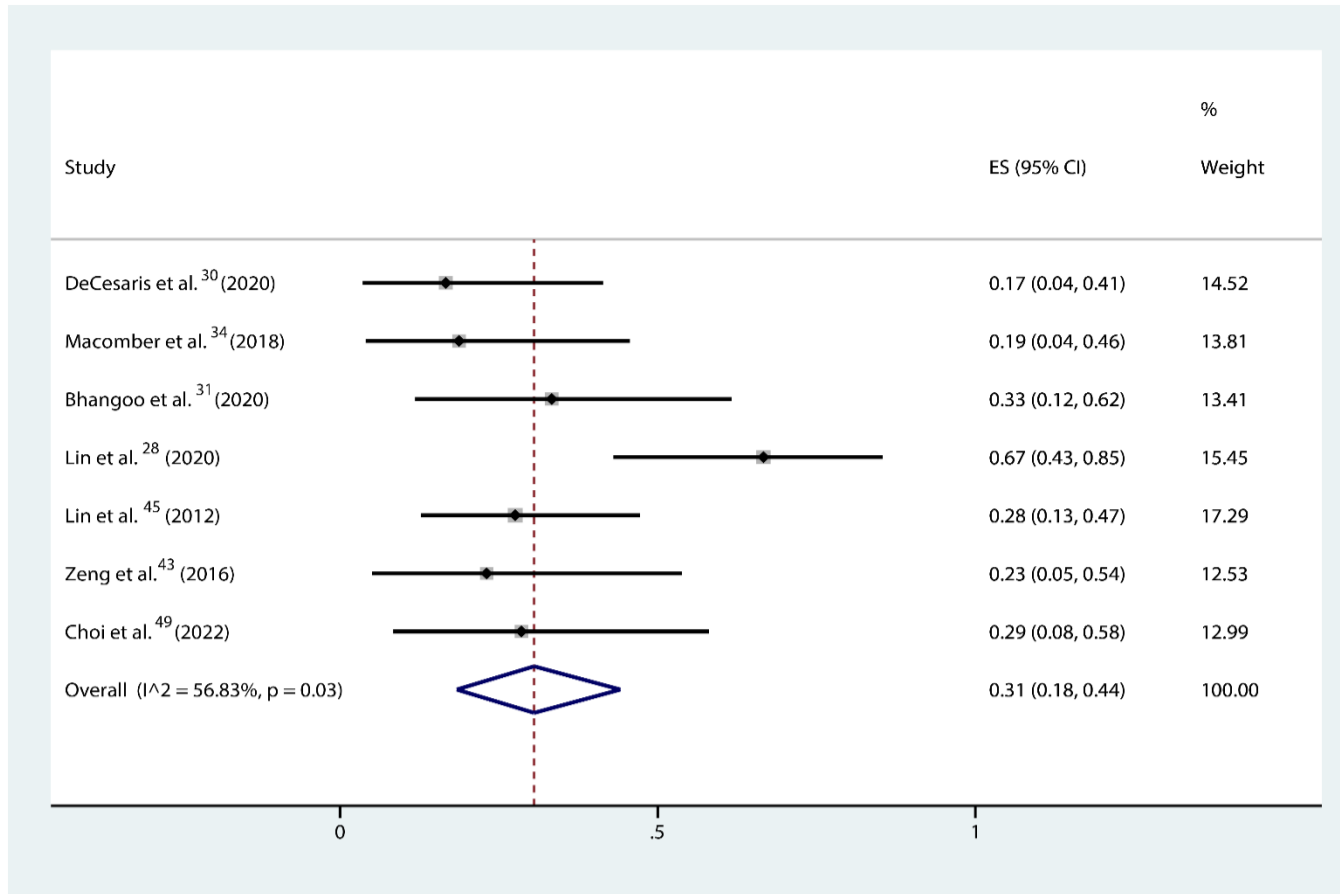

**eTable 1.** Detailed Comparison Information on OARs Dosimetric and Planning Quality From Proton and Photon Radiotherapy Planning

| Reference                              | Patients    | Characteristics                                                             | Dose limitations                                                                                                                                                                                                                         | OARs dose (% diff. between means)                                                                                                                                                                                                                                                                                                                                                                                                                                                                                                                                                                                                                                                                                            | Plans quality                                             |
|----------------------------------------|-------------|-----------------------------------------------------------------------------|------------------------------------------------------------------------------------------------------------------------------------------------------------------------------------------------------------------------------------------|------------------------------------------------------------------------------------------------------------------------------------------------------------------------------------------------------------------------------------------------------------------------------------------------------------------------------------------------------------------------------------------------------------------------------------------------------------------------------------------------------------------------------------------------------------------------------------------------------------------------------------------------------------------------------------------------------------------------------|-----------------------------------------------------------|
| Ribeiro et al. <sup>10</sup><br>2021   | 10 (20)     | PBT (IMPT) vs. VMAT (4DCT)<br>PTV: 41.4 Gy/23F<br>Site: L (80%)             | -                                                                                                                                                                                                                                        | Lung: *D <sub>mean</sub> ↓: 3.8Gy.<br>Heart: *D <sub>mean</sub> ↓: 9.5Gy.                                                                                                                                                                                                                                                                                                                                                                                                                                                                                                                                                                                                                                                    | No SS change                                              |
| Zhang et al. <sup>11</sup><br>2021     | 25          | PBT (PSPT) vs. IMRT/ VMAT (4DCT)<br>PTV: 50.4 Gy/28F<br>Site: -             | Lung: D <sub>mean</sub> <20Gy, V <sub>5</sub> <50%, V <sub>10</sub> <40%, V <sub>20</sub> <20%;<br>Heart: D <sub>mean</sub> <20Gy;<br>VB: D <sub>mean</sub> <18.8Gy, V <sub>10</sub> <54.2% (<260 cc), V <sub>20</sub> <44.3% (<225 cc). | # (vs. IMRT) Lung: *D <sub>mean</sub> ↓: 3.0Gy, *V <sub>5, 10</sub> ↓: 25.3%, 12.9%, V <sub>20</sub> ↓: 4.8%. Heart: *D <sub>mean</sub> ↓: 5.6Gy. SC: *D <sub>max</sub> ↓: 2.4Gy.<br>VB: *D <sub>mean</sub> ↓: 4.9Gy, *V <sub>10, 20</sub> ↓: 18.5%, 12.6%.<br># (vs. VMAT) Lung: *D <sub>mean</sub> ↓: 3.6Gy, *V <sub>5, 10, 20</sub> ↓: 31.7%, 20.4%, 3.7%.<br>Heart: D <sub>mean</sub> ↓: 2.6Gy. SC: D <sub>max</sub> ↑: 4.1Gy.<br>VB: *D <sub>mean</sub> ↓: 2.8Gy, *V <sub>10, 20</sub> ↓: 14.9%, 8.2%.                                                                                                                                                                                                                  | No SS change                                              |
| Anakotta et al. <sup>12</sup><br>2020  | 19 (20)     | PBT (IMPT) vs. VMAT (4DCT)<br>PTV: 41.4-51Gy/17-28F<br>Site: L (18)         | Lung: D <sub>mean</sub> ≤20Gy, V <sub>5</sub> ≤70%, V <sub>20</sub> ≤30%;<br>Heart: D <sub>mean</sub> ≤26Gy.                                                                                                                             | Lung: *D <sub>mean</sub> ↓: 5.0Gy, *V <sub>5, 20</sub> ↓: 32.6%, 5.6%.<br>Heart: *D <sub>mean</sub> ↓: 11.8Gy, *V <sub>5</sub> ↓: 56.3%.<br>SC: *D <sub>max</sub> ↓: 6.2Gy.                                                                                                                                                                                                                                                                                                                                                                                                                                                                                                                                                  | No SS change                                              |
| Celik et al. <sup>13</sup><br>2020     | 20          | PBT (IMPT) vs. VMAT<br>PTV: 41.4Gy/23F<br>Site: L                           | Lung: D <sub>mean</sub> ≤12Gy, V <sub>20</sub> ≤20%;<br>Heart: D <sub>mean</sub> ≤10Gy, V <sub>30</sub> ≤10%.                                                                                                                            | Lung: *D <sub>mean</sub> ↓: 5.7Gy, *V <sub>20</sub> ↓: 4.6%.<br>Heart: *D <sub>mean</sub> ↓: 6.2Gy, *V <sub>30</sub> ↓: 1.0%.<br>LV/ LCA/ LAD: *D <sub>mean</sub> ↓: 4.6/ 3.3/ 3.0Gy.                                                                                                                                                                                                                                                                                                                                                                                                                                                                                                                                        | SS HI ↓; no SS CI                                         |
| Liu et al. <sup>14</sup><br>2019       | 19 vs. 16   | PBT (IMPT) vs. VMAT (4DCT)<br>PTV: 41.4-50.4 Gy<br>Site: -                  | Lung: D <sub>mean</sub> <15Gy, V <sub>5</sub> <60%, V <sub>20</sub> <15%;<br>Heart: D <sub>mean</sub> <26Gy, V <sub>25</sub> <50%, V <sub>40</sub> <30%.                                                                                 | ^Lung: *D <sub>mean</sub> ↓: 4.8Gy, *V <sub>5</sub> ↓: 32.5%, V <sub>20</sub> ↓: 1.8%. (med)<br>^Heart: *D <sub>mean</sub> ↓: 14.3Gy, *V <sub>20</sub> ↓: 35.5%, V <sub>30, 40</sub> ↓: 7.0%, 2.1%.<br>^SC: D <sub>max</sub> ↑: 2.9Gy.                                                                                                                                                                                                                                                                                                                                                                                                                                                                                       | No SS change                                              |
| Møller et al. <sup>15</sup><br>2019    | 26          | PBT (SFUD) vs. IMRT<br>PTV: 41.4-50Gy/23-25F<br>Site: M/L (5/21)            | Lung: D <sub>mean</sub> <19Gy, V <sub>5</sub> <60%, V <sub>20</sub> <35%;<br>Heart: V <sub>25</sub> <40%, V <sub>40</sub> <30%.                                                                                                          | #Lung: *D <sub>mean</sub> ↓: 6.6Gy, *V <sub>5, 20</sub> ↓: 41.1%, 8.2%.<br>#Heart: *D <sub>mean</sub> ↓: 7.9Gy, V <sub>25</sub> ↓: 5.7%, V <sub>40</sub> ↑: 0.2%.                                                                                                                                                                                                                                                                                                                                                                                                                                                                                                                                                            | No SS change                                              |
| Hirano et al. <sup>16</sup><br>2018    | 27 (37)     | PBT vs. IMRT/ 3D-CRT<br>PTV: 60Gy/30F<br>Site: U/M/ L (5/9/13)              | PBT: Lung: V <sub>20</sub> <20%; Heart: D <sub>mean</sub> <26Gy, V <sub>30</sub> <46%.<br>IMRT: Lung: V <sub>20</sub> <30%; Heart: D <sub>mean</sub> <50Gy.<br>3D-CRT: -                                                                 | (vs. IMRT) Lung: *D <sub>mean</sub> ↓: 3.6Gy, *V <sub>5, 10, 15, 20</sub> ↓: 19.9%, 8.7%, 5.1%, 6.1%. SC: D <sub>max</sub> ↓: 1.6Gy.<br>Heart: *D <sub>mean</sub> ↑: 8.1Gy, *V <sub>20, 30, 40</sub> ↓: 30.8%, 28.7%, 10.3%.<br>(vs. 3D-CRT) Lung: *D <sub>mean</sub> ↓: 2.4Gy, *V <sub>5, 20</sub> ↓: 7.8%, 5.3%; V <sub>10, 15</sub> ↓: 4.4%, 3.8%. SC: *D <sub>max</sub> ↓: 9.1Gy.<br>Heart: *D <sub>mean</sub> ↓: 13.4Gy, *V <sub>20, 30, 40</sub> ↓: 25.6%, 34.1%, 31.9%.                                                                                                                                                                                                                                               | (vs. IMRT) SS CI ↑;<br>(vs. 3D-CRT) SS CI ↓               |
| Shiraishi et al. <sup>17</sup><br>2017 | 250 vs. 477 | PBT (95% PSPT) vs. IMRT (4DCT)<br>PTV: 50.4Gy/28F<br>Site: L (223 vs. 428)  | Lung: D <sub>mean</sub> ≤20Gy, V <sub>5</sub> <55%, V <sub>20</sub> ≤35%;<br>Heart: D <sub>mean</sub> <26Gy, V <sub>30</sub> ≤45%.                                                                                                       | Heart: *D <sub>mean</sub> ↓: 10.4Gy, *V <sub>5, 10, 20, 30, 40</sub> ↓: 49.6%, 42.4%, 23.0%, 10.8%, 3.5%.<br>LA/ LV: *D <sub>mean</sub> ↓: 4.0/ 9.5Gy; RA/ RV: *D <sub>mean</sub> ↓: 10.0/ 14.8 Gy.<br>LMC/ LAD/ LCX/ RCA: *D <sub>mean</sub> ↓: 16.8/ 11.1/ 3.5/ 15.1 Gy.                                                                                                                                                                                                                                                                                                                                                                                                                                                   | No SS change                                              |
| Warren et al. <sup>18</sup><br>2017    | 21          | PBT vs. VMAT<br>PTV: 62.5 Gy/25F<br>Site: M                                 | TV: -                                                                                                                                                                                                                                    | #TV: *D <sub>mean</sub> ↓: 3.3Gy, *V <sub>10, 20</sub> ↓: 4%, 10.8%.                                                                                                                                                                                                                                                                                                                                                                                                                                                                                                                                                                                                                                                         | No SS change                                              |
| Warren et al. <sup>19</sup><br>2016    | 21          | PBT vs. VMAT<br>PTV: 62.5 Gy/25F<br>Site: M                                 | Lung: D <sub>mean</sub> <20Gy, V <sub>20</sub> <25%;<br>Heart: D <sub>mean</sub> <25Gy, V <sub>30</sub> <45%.                                                                                                                            | Lung: *D <sub>mean</sub> ↓: 6.8Gy, *V <sub>20</sub> ↓: 8.8%.<br>Heart: *D <sub>mean</sub> ↓: 8.5Gy.                                                                                                                                                                                                                                                                                                                                                                                                                                                                                                                                                                                                                          | No SS change                                              |
| Ling et al. <sup>20</sup><br>2014      | 10          | PBT vs. 3DCRT/IMRT<br>PTV: 50.4Gy/28F<br>Site: L                            | Lung: V <sub>20</sub> <30%;<br>Heart: V <sub>40</sub> <30%.                                                                                                                                                                              | (vs. IMRT) Lung: *D <sub>mean</sub> ↓: 3.5Gy, *V <sub>5, 10, 15</sub> ↓: 25.5%, 18.4%, 10.6%, V <sub>20, 30, 50</sub> ↓: 0.9%, 0.5%, 0.5%, V <sub>40</sub> ↑: 0.8%.<br>Heart: *D <sub>mean</sub> ↓: 15.9Gy, *V <sub>25, 30, 40, 50</sub> ↓: 30.4%, 21.4%, 9.3%, 9.2%.<br>LAD/ LV/ PC: *D <sub>mean</sub> ↓: 17.2/ 16.4/ 12.5Gy.<br>SC: *D <sub>max</sub> ↓: 25.3Gy.<br>(vs. 3D-CRT) Lung: *D <sub>mean</sub> ↓: 3.4Gy, *V <sub>5, 50</sub> ↓: 12.7%, 2.2%; V <sub>10, 15, 20, 30, 40</sub> ↓: 9.7%, 6.6%, 6.8%, 3.7%, 0.4%.<br>SC: *D <sub>max</sub> ↓: 19.6Gy.<br>Heart: *D <sub>mean</sub> ↓: 14.9Gy, *V <sub>25, 30, 40, 50</sub> ↓: 32.6%, 11.8%, 9.6%, 17.2%.<br>LAD/ LV/ PC: *D <sub>mean</sub> ↓: 14.7/ 13.9/ 11.3Gy. | (vs. IMRT) no SS CI, HI<br>(vs. 3D-CRT) no SS CI, SS HI ↑ |
| Welsh et al. <sup>21</sup><br>2011     | 10          | PBT (IMPT) vs. IMRT (4DCT)<br>PTV: 50.4Gy/28F<br>Site: -                    | -                                                                                                                                                                                                                                        | Lung: *D <sub>mean</sub> ↓: 3.4Gy, *V <sub>5, 10</sub> ↓: 19%, 8%, V <sub>20</sub> ↓: 3%.<br>Heart: *D <sub>mean</sub> ↓: 9.3Gy, *V <sub>10, 20, 30</sub> ↓: 50%, 22%, 8%, V <sub>40, 50</sub> ↓: 2%, 0%.<br>SC: D <sub>max</sub> ↑: 0.1Gy.                                                                                                                                                                                                                                                                                                                                                                                                                                                                                  | -                                                         |
| Zhang et al. <sup>22</sup><br>2008     | 15          | PBT (PSPT) vs. IMRT (4DCT)<br>PTV: 50.4 Gy/25F<br>Site: L                   | -                                                                                                                                                                                                                                        | #Lung: *D <sub>mean</sub> ↓: 3.0Gy, *V <sub>5, 10, 20, 30</sub> ↓: 17.4%, 8.4%, 5.0%, 0.5%.<br>#SC: D <sub>max</sub> ↓: 15.4Gy.<br>#Heart: *V <sub>40</sub> ↓: 8.0%; *V <sub>50</sub> ↑: 0.9%.                                                                                                                                                                                                                                                                                                                                                                                                                                                                                                                               | SS CI ↑                                                   |
| Mu et al. <sup>23</sup><br>2011        | 10          | PBT vs. IMRT<br>PTV: 60Gy/30F<br>Site: U                                    | Lung: V <sub>5</sub> <42%, V <sub>10</sub> <35%; V <sub>20</sub> <20%;                                                                                                                                                                   | Lung: *D <sub>mean</sub> ↓: 4.8Gy, *V <sub>5, 20</sub> ↓: 31.4%, 6.1%.<br>SC: D <sub>max</sub> ↓: 6.5Gy.                                                                                                                                                                                                                                                                                                                                                                                                                                                                                                                                                                                                                     | SS CI ↑                                                   |
| Wang et al. <sup>24</sup><br>2015      | 55          | PBT (PSPT) vs. IMRT<br>PTV: 50.4Gy/28F<br>Site: -                           | Lung: D <sub>mean</sub> ≤20Gy, V <sub>20</sub> ≤35%/ 30%;<br>Heart: D <sub>mean</sub> <26Gy, V <sub>30</sub> ≤45%.                                                                                                                       | Lung: *D <sub>mean</sub> ↓: 2.9Gy, *V <sub>5, 10, 20</sub> ↓: 20.3%, 9.7%, 4.2%.<br>Heart: *V <sub>10, 20, 30</sub> ↓: 32.7%, 13.3%, 2.5%.<br>SC: D <sub>max</sub> ↓: 8.5Gy.                                                                                                                                                                                                                                                                                                                                                                                                                                                                                                                                                 | No SS change                                              |
| Suh et al. <sup>25</sup><br>2021       | 48 vs. 29   | PBT vs. 3D-CRT/IMRT (24/5)<br>PTV: 66Gy/33F (med)<br>*Site: L (58% vs. 28%) | -                                                                                                                                                                                                                                        | # ^ (vs. photon) Lung: *D <sub>mean</sub> ↓: 4.8Gy, *V <sub>5, 10, 20, 30</sub> ↓: 26.1%, 14.6%, 3.5%.<br>Heart: *D <sub>mean</sub> ↓: 17.7Gy, *V <sub>5, 10, 20, 30</sub> ↓: 12.7%, 12.7%, 46%, 43.3%.                                                                                                                                                                                                                                                                                                                                                                                                                                                                                                                      | -                                                         |
| Sumiya et al. <sup>27</sup><br>2021    | 54 vs. 15   | PBT vs. 3D-CRT<br>PTV: 56-70Gy/28-35F<br>Site: M+L (80% vs. 67%)            | -                                                                                                                                                                                                                                        | WTB: *V <sub>5, 10, 20, 30, 40, 50</sub> ↓: 10.1%, 8.6%, 16.5%, 26.6%, 19%, 5.3%, V <sub>60</sub> ↓: 0.4%.                                                                                                                                                                                                                                                                                                                                                                                                                                                                                                                                                                                                                   | -                                                         |
| Lin et al. <sup>28</sup><br>2020       | 46 vs. 61   | PBT (80% PSPT) vs. IMRT<br>PTV: 50.4Gy/28F                                  | Lung: D <sub>mean</sub> <20Gy, V <sub>5</sub> <60%, V <sub>10</sub> <40%, V <sub>20</sub> <35%;                                                                                                                                          | #Lung: *D <sub>mean</sub> ↓: 3.6Gy, *V <sub>5, 20</sub> ↓: 21.7%, 5.2%.<br>#Heart: *D <sub>mean</sub> ↓: 8.5Gy.                                                                                                                                                                                                                                                                                                                                                                                                                                                                                                                                                                                                              | PTV coverage<br>SS ↑                                      |



|                                        |                   |                                                                                 |                                                                                                                                                                 |                                                                                                                                                                                                                                                                                                                                                                                                                                                                                                                                            |                                                         |
|----------------------------------------|-------------------|---------------------------------------------------------------------------------|-----------------------------------------------------------------------------------------------------------------------------------------------------------------|--------------------------------------------------------------------------------------------------------------------------------------------------------------------------------------------------------------------------------------------------------------------------------------------------------------------------------------------------------------------------------------------------------------------------------------------------------------------------------------------------------------------------------------------|---------------------------------------------------------|
| Wang et al. <sup>29</sup><br>2020      | 159 vs. 320       | Site: L (83% vs. 84%)<br>PBT (91% PSPT) vs. IMRT<br>PTV: 50.4Gy/28F (med)       | Heart: D <sub>mean</sub> <26Gy, V <sub>30</sub> <45%.<br>-                                                                                                      | #SC: D <sub>max</sub> ↓: 0.1Gy.<br>Heart: *D <sub>mean</sub> ↓: 9.1Gy, *V <sub>5,30</sub> ↓: 45.4%, 8.1%.                                                                                                                                                                                                                                                                                                                                                                                                                                  | -                                                       |
| Bhangoo et al. <sup>31</sup><br>2020   | 32 vs. 32         | Site: L (138 vs. 288)<br>PBT (IMPT) vs. IMRT (4DCT)<br>PTV: 50Gy/25F (med)      | Lung: D <sub>mean</sub> <15Gy, V <sub>20</sub> <20%;<br>Heart: D <sub>mean</sub> <26Gy, V <sub>40</sub> <30%                                                    | #Lung: *D <sub>mean</sub> ↓: 5.3Gy, V <sub>20</sub> ↓: 2%.<br>#Heart: *D <sub>mean</sub> ↓: 11.2Gy, *V <sub>30</sub> ↓: 7%.                                                                                                                                                                                                                                                                                                                                                                                                                | -                                                       |
| Macomber et al. <sup>34</sup><br>2018  | 16 vs. 39         | PBT vs. IMRT/3D-CRT (21/18)<br>PTV: 50.4Gy/28F<br>Site: L (82%)                 | -                                                                                                                                                               | (vs. IMRT) Heart: *D <sub>mean</sub> ↓: 16.1Gy, *V <sub>5,40</sub> ↓: 66%, 6%, V <sub>50</sub> ↓: 1%.<br>(vs. 3D-CRT) Heart: *D <sub>mean</sub> ↓: 25.1Gy, *V <sub>5,40,50</sub> ↓: 64%, 27%, 6%.                                                                                                                                                                                                                                                                                                                                          | -                                                       |
| Xi et al. <sup>35</sup><br>2017        | 132 vs. 211       | PBT vs. IMRT<br>PTV: 50.4Gy/28F (med)<br>Site: L (71% vs. 73%)                  | Lung: D <sub>mean</sub> <20Gy, V <sub>20</sub> <35%;<br>Heart: V <sub>40</sub> <40%.                                                                            | Lung: *D <sub>mean</sub> ↓: 3.5Gy, *V <sub>5,10,20</sub> ↓: 19.7%, 9.1%, 7.1%.<br>Heart: *D <sub>mean</sub> ↓: 8.3Gy, *V <sub>30</sub> ↓: 5.5%, V <sub>40</sub> ↓: 0.3%.                                                                                                                                                                                                                                                                                                                                                                   | PTV coverage<br>SS ↑                                    |
| Lin et al. <sup>37</sup><br>2017       | 111 vs. 469       | PBT vs. 3D-CRT/IMRT (214/ 255)<br>PTV: 50.4Gy/28F<br>*Site: L (98% vs. 88%/95%) | Lung: D <sub>mean</sub> <20Gy, V <sub>20</sub> <35%;<br>Heart: V <sub>40</sub> <40%.                                                                            | (vs. 3D-CRT) Lung: *D <sub>mean</sub> ↓: 4.4Gy;<br>Heart: *D <sub>mean</sub> ↓: 15.2Gy.<br>(vs. IMRT) Lung: *D <sub>mean</sub> ↓: 3.4Gy;<br>Heart: *D <sub>mean</sub> ↓: 9.2Gy.                                                                                                                                                                                                                                                                                                                                                            | -                                                       |
| Makishima et al. <sup>38</sup><br>2015 | 44<br>(25 vs. 19) | PBT (IMPT) vs. 3D-CRT<br>PTV: 60Gy/30F (med)<br>Site: M (88%)                   | -                                                                                                                                                               | # (25 vs. 25) Lung: *D <sub>mean</sub> ↓: 3.6Gy, *V <sub>5,10,20</sub> ↓: 14.7%, 10%, 7.0%.<br>Heart: *V <sub>30,40,50</sub> ↓: 41.8%, 36.5%, 23.5%.<br># (19 vs. 19) Lung: *D <sub>mean</sub> ↓: 8.0Gy *V <sub>5,10,20</sub> ↓: 26.7%, 17.9%, 13.4%.<br>Heart: *V <sub>30,40,50</sub> ↓: 46.2%, 46.1%, 13.5%.                                                                                                                                                                                                                             | -                                                       |
| Zhu et al. <sup>46</sup><br>2021       | 246 vs. 500       | PBT vs. PRT<br>PTV: 50.4Gy<br>Site: L (88% vs. 86%)                             | -                                                                                                                                                               | (vs. photon) Lung: *D <sub>mean</sub> ↓: 4.1Gy, *V <sub>5-40</sub> ↓: 21.9%, 10.1%, 7.7%, 7.6%, 2.8%, 1.43%, 0.72%. V <sub>45,50</sub> : 0.2%, 0%.<br>Heart: *D <sub>mean</sub> ↓: 10.4Gy, *V <sub>5-45</sub> ↓: 48.9%, 42.5%, 32%, 23.4%, 16.2%, 10.6%, 6.3%, 3.4%, 1.5%; V <sub>50</sub> ↓: 0.6%.                                                                                                                                                                                                                                        | -                                                       |
| Oonsiri et al. <sup>47</sup><br>2022   | 25                | PBT (IMPT) vs. IMRT<br>PTV: 60-66Gy/ F<br>Site: U+M (76%)                       | -                                                                                                                                                               | Lung: *D <sub>mean</sub> ↓: 6.8Gy, *V <sub>5,10,15,20,30</sub> ↓: 30%, 27.4%, 18.6%, 11.3%, 3.8%, V <sub>40</sub> ↓: 0.5%;<br>Heart: *D <sub>mean</sub> ↓: 6.5Gy. *V <sub>10,20,30,40,50</sub> ↓: 43.6%, 40.4%, 28.4%, 15.8%, 7.3%.                                                                                                                                                                                                                                                                                                        | No SS change                                            |
| Choi et al. <sup>49</sup><br>2022      | 15 vs. 16         | PBT vs. PRT<br>PTV: 41.4Gy/28F<br>Site: M+L (73% vs. 69%)                       | -                                                                                                                                                               | Lung: *D <sub>mean</sub> ↓: 3.9Gy, *V <sub>10,20</sub> ↓: 9.4%, 4.2%;<br>Heart: *D <sub>mean</sub> ↓: 13.6Gy. *V <sub>10,30,40</sub> ↓: 25.4%, 33.5%, 22.9%.                                                                                                                                                                                                                                                                                                                                                                               | -                                                       |
| Kato et al. <sup>50</sup><br>2022      | 10                | PBT (IMPT) vs. VMAT<br>PTV: 60Gy/30F<br>Site: U                                 | Lung: V <sub>20</sub> <30%, V <sub>30</sub> <20%;                                                                                                               | Lung: *D <sub>mean</sub> ↓: 3.0Gy, *V <sub>5,10,20</sub> ↓: 12.8%, 11.0%, 5.3%, V <sub>30,40</sub> ↓: 1.5%, 0.4%.                                                                                                                                                                                                                                                                                                                                                                                                                          | no SS CI, SS HI<br>↓                                    |
| Zhang et al. <sup>51</sup><br>2022     | 11                | PBT (IMPT) vs. IMRT<br>PTV: 50.4Gy/28F<br>-                                     | Lung: D <sub>mean</sub> ≤15Gy, V <sub>20</sub> ≤30%,<br>V <sub>30</sub> ≤30%;<br>Heart: D <sub>mean</sub> ≤30Gy, V <sub>30</sub> ≤40%,<br>V <sub>40</sub> ≤30%. | Lung: D <sub>mean</sub> ↓: 8.4Gy, V <sub>5,10,15,20</sub> ↓: 40.8%, 26.6%, 19.9%, 15.4%.<br>Heart: D <sub>mean</sub> ↓: 11.6Gy. *V <sub>10,20</sub> ↓: 30.9%, 32.9%.<br>(No statistical tests).                                                                                                                                                                                                                                                                                                                                            | -                                                       |
| Cui et al. <sup>52</sup><br>2022       | 30                | PBT (IMPT) vs. IMRT/VMAT<br>PTV: 60Gy/30F<br>-                                  | Lung: V <sub>5</sub> <65%, V <sub>20</sub> <25%;<br>Heart: D <sub>mean</sub> <26Gy, V <sub>30</sub> <46%.                                                       | (vs. IMRT) Lung: *D <sub>mean</sub> ↓: 8.4Gy, *V <sub>5,10,15,20</sub> ↓: 40.8%, 26.6%, 19.9%, 15.4%. Heart: *D <sub>mean</sub> ↓: 11.6Gy. *V <sub>10,20</sub> ↓: 30.9%, 32.9%, V <sub>5,30,40</sub> ↓: 29.5%, 20.9%, 9.9%. SC: D <sub>max</sub> ↓: 4.7Gy.<br>(vs. VMAT) Lung: *D <sub>mean</sub> ↓: 7.3Gy, *V <sub>5,10,15</sub> ↓: 43.8%, 24.0%, 14.4%, V <sub>20</sub> ↓: 8.8%. Heart: *D <sub>mean</sub> ↓: 14.6Gy, *V <sub>20,30,40</sub> ↓: 34.1%, 28.3%, 21.33%, V <sub>5,10</sub> ↓: 27.2%, 27.9%. SC: *D <sub>max</sub> ↓: 8.9Gy. | (vs. IMRT) no<br>SS CI, HI<br>(vs. VMAT) SS<br>CI, HI ↑ |

Key: All represent as mean ± SD (except special explain). #: represent as median; ^: represent obtained from picture; \*: represent statistically significant; SS: statistically significantly; OARs: organs at risk; PTV: planning target volume; F: fraction; U/M/L: upper/ middle/ lower thoracic; D<sub>mean</sub>: mean dose; V<sub>x</sub>: volume receiving ≥x Gy; PBT: proton beam therapy; PRT: photon radiotherapy; SFUD: single-field uniform dose; IMPT: intensity modulated proton therapy; PSPT: passive scattering proton therapy; IMRT: intensity modulated proton therapy; CTV: clinical target volume; SC: spinal cord; LA(RA): left (right) atrium; LV(RV): left (right) ventricle; LCA: Left coronary artery; LMC: left main coronary artery; LAD: left anterior descending artery; LCX: left circumflex; RCA: right coronary artery; PC: Pericardium; HI: homogeneity index; CI: conformity index; VB: Vertebral Body (outline of the vertebrae, C2-L1); TV: thoracic vertebrae body (T1-T12); WTB: including the vertebrae of C5 to T12, all ribs, and the whole sternum.

**eTable 2. Results of Quality Assessment Using the Newcastle-Ottawa Scale for Non-RCT Studies (Dosimetric Parameters)**

| Reference                              | Representativeness of the exposed cohort | Selection of the non-exposed cohort | Ascertainment of exposure | Demonstration that the interest was not present at start of study | Comparability of Cohorts on the basis of the design or analysis | Assessment of outcome | Was follow-up long enough for outcome to occur | Adequacy of follow-up of cohorts | Total score |
|----------------------------------------|------------------------------------------|-------------------------------------|---------------------------|-------------------------------------------------------------------|-----------------------------------------------------------------|-----------------------|------------------------------------------------|----------------------------------|-------------|
| Zhang et al. <sup>11</sup><br>2021     | ☆                                        | ☆                                   | ☆                         | ☆                                                                 | ☆☆                                                              | ☆                     | ☆                                              | ☆                                | 9           |
| Anakotta et al. <sup>12</sup><br>2020  | ☆                                        | ☆                                   | ☆                         | ☆                                                                 | ☆☆                                                              | ☆                     | ☆                                              | ☆                                | 9           |
| Celik et al. <sup>13</sup><br>2020     | ☆                                        | ☆                                   | ☆                         | ☆                                                                 | ☆☆                                                              | ☆                     | ☆                                              | ☆                                | 9           |
| Liu et al. <sup>14</sup><br>2019       | ☆                                        | ☆                                   | ☆                         | ☆                                                                 | ☆                                                               | ☆                     | ☆                                              | ☆                                | 8           |
| Møller et al. <sup>15</sup><br>2019    | ☆                                        | ☆                                   | ☆                         | ☆                                                                 | ☆☆                                                              | ☆                     | ☆                                              | ☆                                | 9           |
| Hirano et al. <sup>16</sup><br>2018    | ☆                                        | ☆                                   | ☆                         | ☆                                                                 | ☆                                                               | ☆                     | ☆                                              | ☆                                | 8           |
| Shiraishi et al. <sup>17</sup><br>2017 | ☆                                        | ☆                                   | ☆                         | ☆                                                                 | ☆                                                               | ☆                     | ☆                                              | ☆                                | 8           |
| Warren et al. <sup>18</sup><br>2017    | ☆                                        | ☆                                   | ☆                         | ☆                                                                 | ☆                                                               | ☆                     | ☆                                              | ☆                                | 8           |
| Warren et al. <sup>19</sup><br>2016    | ☆                                        | ☆                                   | ☆                         | ☆                                                                 | ☆☆                                                              | ☆                     | ☆                                              | ☆                                | 9           |
| Ling et al. <sup>20</sup><br>2014      | ☆                                        | ☆                                   | ☆                         | ☆                                                                 | ☆☆                                                              | ☆                     | ☆                                              | ☆                                | 9           |
| Welsh et al. <sup>21</sup><br>2011     | ☆                                        | ☆                                   | ☆                         | ☆                                                                 | ☆                                                               | ☆                     | ☆                                              | ☆                                | 8           |
| Zhang et al. <sup>22</sup><br>2008     | ☆                                        | ☆                                   | ☆                         | ☆                                                                 | ☆                                                               | ☆                     | ☆                                              | ☆                                | 8           |
| Mu et al. <sup>23</sup><br>2011        | ☆                                        | ☆                                   | ☆                         | ☆                                                                 | ☆☆                                                              | ☆                     | ☆                                              | ☆                                | 9           |
| Sumiya et al. <sup>27</sup><br>2021    | ☆                                        | ☆                                   | ☆                         | ☆                                                                 | -                                                               | ☆                     | ☆                                              | ☆                                | 7           |
| Lin et al. <sup>28</sup><br>2020       | ☆                                        | ☆                                   | ☆                         | ☆                                                                 | ☆                                                               | ☆                     | ☆                                              | ☆                                | 8           |
| Wang et al. <sup>29</sup><br>2020      | ☆                                        | ☆                                   | ☆                         | ☆                                                                 | -                                                               | ☆                     | ☆                                              | ☆                                | 7           |
| Bhangoo et al. <sup>31</sup><br>2020   | ☆                                        | ☆                                   | ☆                         | ☆                                                                 | ☆                                                               | ☆                     | ☆                                              | ☆                                | 8           |
| Xi et al. <sup>35</sup><br>2017        | ☆                                        | ☆                                   | ☆                         | ☆                                                                 | ☆                                                               | ☆                     | ☆                                              | ☆                                | 8           |
| Lin et al. <sup>37</sup><br>2017       | ☆                                        | ☆                                   | ☆                         | ☆                                                                 | ☆                                                               | ☆                     | ☆                                              | ☆                                | 8           |
| Kato et al. <sup>50</sup><br>2022      | ☆                                        | ☆                                   | ☆                         | ☆                                                                 | ☆☆                                                              | ☆                     | ☆                                              | ☆                                | 9           |
| Zhang et al. <sup>51</sup><br>2022     | ☆                                        | ☆                                   | ☆                         | ☆                                                                 | ☆☆                                                              | ☆                     | ☆                                              | ☆                                | 9           |
| Cui et al. <sup>52</sup><br>2022       | ☆                                        | ☆                                   | ☆                         | ☆                                                                 | ☆☆                                                              | ☆                     | ☆                                              | ☆                                | 9           |

**eTable 3. Results of Quality Assessment Using the Newcastle-Ottawa Scale for Non-RCT Studies (Efficacy and Safety of Proton vs Photon Therapy)**

| Reference                              | Representativeness of the exposed cohort | Selection of the non-exposed cohort | Ascertainment of exposure | Demonstration that the interest was not present at start of study | Comparability of Cohorts on the basis of the design or analysis | Assessment of outcome | Was follow-up long enough for outcome to occur | Adequacy of follow up of cohorts | Total score |
|----------------------------------------|------------------------------------------|-------------------------------------|---------------------------|-------------------------------------------------------------------|-----------------------------------------------------------------|-----------------------|------------------------------------------------|----------------------------------|-------------|
| Suh et al. <sup>25</sup><br>2021       | ☆                                        | ☆                                   | ☆                         | ☆                                                                 | ☆                                                               | ☆                     | ☆                                              | ☆                                | 8           |
| Sumiya et al. <sup>27</sup><br>2021    | ☆                                        | ☆                                   | ☆                         | ☆                                                                 | -                                                               | ☆                     | -                                              | ☆                                | 6           |
| DeCesaris et al. <sup>30</sup><br>2020 | ☆                                        | ☆                                   | ☆                         | ☆                                                                 | -                                                               | ☆                     | -                                              | ☆                                | 6           |
| Bhangoo et al. <sup>31</sup><br>2020   | ☆                                        | ☆                                   | ☆                         | ☆                                                                 | ☆                                                               | ☆                     | -                                              | ☆                                | 7           |
| Routman et al. <sup>32</sup><br>2019   | ☆                                        | ☆                                   | ☆                         | ☆                                                                 | -                                                               | ☆                     | ☆                                              | ☆                                | 7           |
| Shiraishi et al. <sup>33</sup><br>2018 | ☆                                        | ☆                                   | ☆                         | ☆                                                                 | ☆                                                               | ☆                     | ☆                                              | ☆                                | 8           |
| Macomber et al. <sup>34</sup><br>2018  | ☆                                        | ☆                                   | ☆                         | ☆                                                                 | ☆                                                               | ☆                     | -                                              | ☆                                | 7           |
| Xi et al. <sup>35</sup><br>2017        | ☆                                        | ☆                                   | ☆                         | ☆                                                                 | ☆                                                               | ☆                     | ☆                                              | ☆                                | 8           |
| Fang et al. <sup>36</sup><br>2018      | ☆                                        | ☆                                   | ☆                         | ☆                                                                 | ☆                                                               | ☆                     | ☆                                              | ☆                                | 8           |
| Makishima et al. <sup>38</sup><br>2015 | ☆                                        | ☆                                   | ☆                         | ☆                                                                 | -                                                               | ☆                     | ☆                                              | ☆                                | 7           |
| Zhu et al. <sup>46</sup><br>2021       | ☆                                        | ☆                                   | ☆                         | ☆                                                                 | ☆                                                               | ☆                     | ☆                                              | ☆                                | 8           |
| Choi et al. <sup>49</sup><br>2022      | ☆                                        | ☆                                   | ☆                         | ☆                                                                 | ☆                                                               | ☆                     | -                                              | ☆                                | 7           |

**eTable 4. Results of Quality Assessment Using the Cochrane Collaboration's Tool (RCT)**

| Reference                        | Random sequence generation | Allocation concealment | Blinding | Incomplete outcome data | Selective reporting | Other bias |
|----------------------------------|----------------------------|------------------------|----------|-------------------------|---------------------|------------|
| Lin et al. <sup>28</sup><br>2020 | Low                        | Unclear                | High     | Low                     | Low                 | Unclear    |

**eTable 5. Results of Quality Assessment Using the MINORS (Single-Group Tests)**

| Reference                               | A clearly stated aim | Inclusion of consecutive patients | Prospective collection of data | Endpoints appropriate to the aim of the study | Unbiased assessment of the study endpoint | Follow-up period appropriate to the aim of the study | Loss to follow up less than 5% | Prospective calculation of the study size | Total score |
|-----------------------------------------|----------------------|-----------------------------------|--------------------------------|-----------------------------------------------|-------------------------------------------|------------------------------------------------------|--------------------------------|-------------------------------------------|-------------|
| Echeverria et al. <sup>4</sup><br>2013  | 2                    | 2                                 | 2                              | 2                                             | 0                                         | 2                                                    | 2                              | 0                                         | 12          |
| Hirano et al. <sup>16</sup><br>2018     | 2                    | 2                                 | 2                              | 2                                             | 0                                         | 1                                                    | 2                              | 0                                         | 11          |
| Parzen et al. <sup>39</sup><br>2021     | 2                    | 1                                 | 2                              | 2                                             | 0                                         | 2                                                    | 2                              | 0                                         | 11          |
| Ogawa et al. <sup>40</sup><br>2021      | 2                    | 2                                 | 2                              | 2                                             | 0                                         | 2                                                    | 2                              | 0                                         | 12          |
| Sato et al. <sup>41</sup><br>2020       | 2                    | 2                                 | 2                              | 2                                             | 0                                         | 1                                                    | 2                              | 0                                         | 11          |
| Prayongrat et al. <sup>42</sup><br>2017 | 2                    | 2                                 | 2                              | 2                                             | 0                                         | 1                                                    | 2                              | 0                                         | 11          |
| Zeng et al. <sup>43</sup><br>2016       | 2                    | 2                                 | 1                              | 1                                             | 0                                         | 1                                                    | 2                              | 0                                         | 9           |
| Ishikawa et al. <sup>44</sup><br>2015   | 2                    | 2                                 | 2                              | 2                                             | 0                                         | 2                                                    | 2                              | 0                                         | 12          |
| Lin et al. <sup>45</sup><br>2012        | 2                    | 2                                 | 2                              | 2                                             | 0                                         | 1                                                    | 2                              | 0                                         | 11          |
| Rutenburg et al. <sup>53</sup><br>2023  | 2                    | 2                                 | 2                              | 2                                             | 0                                         | 1                                                    | 2                              | 0                                         | 11          |

**eTable 6. Pooled Analysis of Dose-Volume Parameters for OARs with Proton vs Photon Therapy**

|                            | vs. 3D-CRT                                     | vs. IMRT                                        | vs. VMAT                                        | Overall (Proton vs. Photon)                     | Egger's test (P value) |
|----------------------------|------------------------------------------------|-------------------------------------------------|-------------------------------------------------|-------------------------------------------------|------------------------|
| <b>Lung</b>                |                                                |                                                 |                                                 |                                                 |                        |
| D <sub>mean</sub> (Gy)     | -3.46 (-5.03, -1.88)<br>I <sup>2</sup> = 77%   | -4.66 (-5.70, -3.61)<br>I <sup>2</sup> = 88%    | -4.41 (-7.14, -1.68)<br>I <sup>2</sup> = 96%    | -4.42 (-5.38, -3.47)<br>I <sup>2</sup> = 93%    | 0.959                  |
| V <sub>5</sub> (%)         | -8.83 (-13.55, -4.11)<br>I <sup>2</sup> = 0%   | -26.89 (-32.19, -21.58)<br>I <sup>2</sup> = 86% | -25.93 (-47.42, -4.45)<br>I <sup>2</sup> = 98%  | -24.81 (-31.40, -18.21)<br>I <sup>2</sup> = 95% | 0.199                  |
| V <sub>10</sub> (%)        | -5.35 (-9.38, -1.32)<br>I <sup>2</sup> = 0%    | -12.87 (-17.91, -7.83)<br>I <sup>2</sup> = 83%  | -17.51 (-26.57, -8.45)<br>I <sup>2</sup> = 79%  | -12.92 (-16.84, -9.00)<br>I <sup>2</sup> = 82%  | 0.359                  |
| V <sub>20</sub> (%)        | -5.48 (-8.18, -2.78)<br>I <sup>2</sup> = 0%    | -7.16 (-9.77, -4.55)<br>I <sup>2</sup> = 89%    | -5.55 (-7.71, -3.38)<br>I <sup>2</sup> = 64%    | -6.52 (-8.24, -4.79)<br>I <sup>2</sup> = 84%    | 0.511                  |
| V <sub>30</sub> (%)        | -<br>I <sup>2</sup> = 0%                       | -3.56 (-9.24, 2.12)<br>I <sup>2</sup> = 95%     | -<br>I <sup>2</sup> = 0%                        | -3.05 (-5.86, -0.25)<br>I <sup>2</sup> = 89%    | *                      |
| V <sub>40</sub> (%)        | -<br>I <sup>2</sup> = 0%                       | -<br>I <sup>2</sup> = 0%                        | -<br>I <sup>2</sup> = 0%                        | -0.26 (-0.87, 0.34)<br>I <sup>2</sup> = 0%      | *                      |
| <b>Heart</b>               |                                                |                                                 |                                                 |                                                 |                        |
| D <sub>mean</sub> (Gy)     | -15.08 (-16.36, -13.80)<br>I <sup>2</sup> = 0% | -8.74 (-10.53, -6.94)<br>I <sup>2</sup> = 90%   | -8.86 (-12.02, -5.69)<br>I <sup>2</sup> = 89%   | -9.52 (-11.11, -7.94)<br>I <sup>2</sup> = 92%   | 0.588                  |
| V <sub>5</sub> (%)         | /<br>I <sup>2</sup> = 0%                       | -45.29 (-51.22, -39.37)<br>I <sup>2</sup> = 81% | -42.51 (-70.90, -14.13)<br>I <sup>2</sup> = 92% | -45.06 (-51.18, -38.94)<br>I <sup>2</sup> = 82% | *                      |
| V <sub>10</sub> (%)        | /<br>I <sup>2</sup> = 0%                       | -42.36 (-49.92, -34.79)<br>I <sup>2</sup> = 66% | -<br>I <sup>2</sup> = 0%                        | -39.52 (-47.45, -31.60)<br>I <sup>2</sup> = 72% | *                      |
| V <sub>20</sub> (%)        | -<br>I <sup>2</sup> = 0%                       | -25.36 (-30.17, -20.55)<br>I <sup>2</sup> = 41% | -<br>I <sup>2</sup> = 0%                        | -26.60 (-31.90, -22.12)<br>I <sup>2</sup> = 43% | *                      |
| V <sub>30</sub> (%)        | -22.75 (-44.70, -0.81)<br>I <sup>2</sup> = 92% | -13.07 (-16.67, -9.48)<br>I <sup>2</sup> = 85%  | -10.51 (-22.16, 114)<br>I <sup>2</sup> = 93%    | -13.89 (-17.84, -9.95)<br>I <sup>2</sup> = 93%  | <0.001                 |
| V <sub>40</sub> (%)        | -20.54 (-42.39, 1.31)<br>I <sup>2</sup> = 93%  | -5.17 (-7.92, -2.43)<br>I <sup>2</sup> = 82%    | -9.23 (-32.05, 13.59)<br>I <sup>2</sup> = 95%   | -7.44 (-10.66, -4.22)<br>I <sup>2</sup> = 89%   | <0.001                 |
| V <sub>50</sub> (%)        | -<br>I <sup>2</sup> = 0%                       | -1.92 (-7.57, 3.74)<br>I <sup>2</sup> = 82%     | /<br>I <sup>2</sup> = 0%                        | -5.28 (-12.27, 1.70)<br>I <sup>2</sup> = 89%    | *                      |
| LV-D <sub>mean</sub> (Gy)  | -<br>I <sup>2</sup> = 0%                       | -12.43 (-19.11, -5.75)<br>I <sup>2</sup> = 84%  | -<br>I <sup>2</sup> = 0%                        | -10.20 (-14.32, -6.08)<br>I <sup>2</sup> = 95%  | *                      |
| LAD-D <sub>mean</sub> (Gy) | -<br>I <sup>2</sup> = 0%                       | -13.88 (-19.84, -7.93)<br>I <sup>2</sup> = 90%  | -<br>I <sup>2</sup> = 0%                        | -11.24 (-17.31, -5.61)<br>I <sup>2</sup> = 99%  | *                      |
| <b>BM</b>                  |                                                |                                                 |                                                 |                                                 |                        |
| D <sub>mean</sub> (Gy)     | /<br>I <sup>2</sup> = 0%                       | -<br>I <sup>2</sup> = 0%                        | -3.00 (-5.25, -0.75)<br>I <sup>2</sup> = 28%    | -2.89 (-4.46, -1.32)<br>I <sup>2</sup> = 0%     | *                      |
| V <sub>10</sub> (%)        | -<br>I <sup>2</sup> = 0%                       | -<br>I <sup>2</sup> = 0%                        | -11.22 (-16.34, -6.10)<br>I <sup>2</sup> = 0%   | -10.21 (-13.99, -6.42)<br>I <sup>2</sup> = 0%   | *                      |
| V <sub>20</sub> (%)        | -<br>I <sup>2</sup> = 0%                       | -<br>I <sup>2</sup> = 0%                        | -9.68 (-19.28, -0.08)<br>I <sup>2</sup> = 77%   | -10.33 (-16.20, -4.47)<br>I <sup>2</sup> = 69%  | *                      |
| <b>SC</b>                  |                                                |                                                 |                                                 |                                                 |                        |
| D <sub>max</sub> (Gy)      | -13.52 (-23.56, -3.48)<br>I <sup>2</sup> = 81% | -7.14 (-10.95, -3.34)<br>I <sup>2</sup> = 92%   | -3.86 (-9.39, 1.67)<br>I <sup>2</sup> = 89%     | -6.93 (-9.73, -4.13)<br>I <sup>2</sup> = 91%    | 0.097                  |

Key: All represent mean and 95%CI (confidence interval); /: represent no one study; -: represent only one study; \*: represent included studies less than ten (P <0.05, represent significant publication bias); D<sub>mean</sub>: mean dose; V<sub>x</sub>: percentage of volume receiving ≥x Gy; LV: left ventricle; LAD: left anterior descending artery; BM: bone marrow; SC: spinal cord; Heart-V<sub>30</sub>, V<sub>40</sub> observed to have publication bias by Egger's test (P <0.05), there were two (results dose not significantly changed) and zero potential studies added by the trim-and-fill method.

**eTable 7.** Pooled Analysis of the Incidence of Toxic Effects in the Proton and Photon Therapy Group (Described as OR)

|                        | Acute               | Late                 | Unknown | Total                           |
|------------------------|---------------------|----------------------|---------|---------------------------------|
| <b>RE</b>              |                     |                      |         |                                 |
| G2+                    | 1.69 (0.76, 3.75)   | /                    | -       | 1.11 (0.76, 1.63)               |
|                        | I <sup>2</sup> = 0% |                      |         | I <sup>2</sup> = 0%             |
| G3+                    | 1.15 (0.40, 3.29)   | /                    | -       | 0.84 (0.48, 1.46)               |
|                        | I <sup>2</sup> = 0% |                      |         | I <sup>2</sup> = 0%             |
| G4+                    | -                   | /                    | -       | 0.53 (0.02, 13.1)               |
|                        |                     |                      |         | I <sup>2</sup> = Not applicable |
| <b>RP</b>              |                     |                      |         |                                 |
| G2+                    | -                   | -                    | -       | 0.40 (0.17, 0.97)               |
|                        |                     |                      |         | I <sup>2</sup> = 0%             |
| G3+                    | -                   | -                    | -       | 0.45 (0.12, 1.67)               |
|                        |                     |                      |         | I <sup>2</sup> = 0%             |
| G4+                    | -                   | -                    | -       | 0.80 (0.07, 8.88)               |
|                        |                     |                      |         | I <sup>2</sup> = Not applicable |
| <b>PE</b>              |                     |                      |         |                                 |
| G2+                    | /                   | 0.55 (0.10, 2.91)    | -       | 0.73 (0.32, 1.65)               |
|                        |                     | I <sup>2</sup> = 35% |         | I <sup>2</sup> = 35%            |
| G3+                    | -                   | -                    | -       | 0.28 (0.06, 1.32)               |
|                        |                     |                      |         | I <sup>2</sup> = 0%             |
| G4+                    | -                   | -                    | -       | Not estimable                   |
|                        |                     |                      |         |                                 |
| <b>PCE</b>             |                     |                      |         |                                 |
| G2+                    | /                   | 0.15 (0.01, 2.08)    | -       | 0.20 (0.04, 0.96)               |
|                        |                     | I <sup>2</sup> = 71% |         | I <sup>2</sup> = 44%            |
| G3+                    | -                   | -                    | -       | 0.34 (0.06, 2.06)               |
|                        |                     |                      |         | I <sup>2</sup> = 0%             |
| G4+                    | -                   | -                    | -       | Not estimable                   |
|                        |                     |                      |         |                                 |
| <b>lymphocytopenia</b> |                     |                      |         |                                 |
| G2+                    | -                   | /                    | /       | -                               |
| G3+                    | -                   | /                    | /       | -                               |
| G4+                    | 0.35 (0.28, 0.45)   | /                    | /       | 0.35 (0.28, 0.45)               |
|                        | I <sup>2</sup> = 0% |                      |         | I <sup>2</sup> = 0%             |

Key: All presented as OR (odds ratio) and 95%CI (confidence interval); /: represent no one study; -: represent no sufficient data to analysis; G2+/3+/4+: toxicity grade  $\geq$  2/3/4; RE: radiation related esophagitis; RP: radiation pneumonitis; PE: Pleural effusion; PCE: pericardial effusion.

**eTable 8.** Single-Rate Pooled Analysis for the Incidence of Toxic Effects in Proton Therapy

|                 | Acute                    | Late                     | Unknown                  | Total                    |
|-----------------|--------------------------|--------------------------|--------------------------|--------------------------|
| <b>G2+</b>      |                          |                          |                          |                          |
| RE              | 0.51 (95%CI: 0.35, 0.66) | /                        | 0.46 (95%CI: 0.39, 0.53) | 0.50 (95%CI: 0.40, 0.59) |
|                 | I <sup>2</sup> = 68.7%   |                          | ^                        | I <sup>2</sup> = 60.8%   |
| RP              | 0.03 (95%CI: 0.00, 0.17) | 0.00 (95%CI: 0.00, 0.01) | 0.04 (95%CI: 0.02, 0.07) | 0.02 (95%CI: 0.00, 0.06) |
|                 | I <sup>2</sup> = 91.5%   | I <sup>2</sup> = 0%      | ^                        | I <sup>2</sup> = 83.4%   |
| PE              | /                        | 0.03 (95%CI: 0.00, 0.08) | -                        | 0.04 (95%CI: 0.02, 0.07) |
|                 |                          | ^                        |                          | I <sup>2</sup> = 0%      |
| PCE             | 0.00 (95%CI: 0.00, 0.04) | 0.05 (95%CI: 0.01, 0.11) | -                        | 0.03 (95%CI: 0.00, 0.07) |
|                 | ^                        | I <sup>2</sup> = 57.8%   |                          | I <sup>2</sup> = 62.7%   |
| <b>G3+</b>      |                          |                          |                          |                          |
| RE              | 0.08 (95%CI: 0.04, 0.15) | -                        | 0.11 (95%CI: 0.07, 0.16) | 0.08 (95%CI: 0.05, 0.12) |
|                 | I <sup>2</sup> = 63.6%   |                          | ^                        | I <sup>2</sup> = 57.1%   |
| <b>G4+</b>      |                          |                          |                          |                          |
| lymphocytopenia | 0.17 (95%CI: 0.07, 0.30) | /                        | /                        | 0.17 (95%CI: 0.07, 0.30) |
|                 | I <sup>2</sup> = 93.8%   |                          |                          | I <sup>2</sup> = 93.8%   |

Key: CI: confidence interval; /: represent no one study; -: represent no sufficient data to analysis; ^: because included studies  $\leq 3$  (after double-arcsine transformations); G2/3/4+: toxicity grade  $\geq 2/3/4$ ; RE: radiation related esophagitis; RP: radiation pneumonitis; PE: Pleural effusion; PCE: pericardial effusion.
