# Supplementary material for: Efficacy and Safety in Proton Therapy and Photon Therapy for Patients With Esophageal Cancer: A Meta-Analysis
Source: PubMed Central journal article supplement (PMC10427943; doi:10.1001/jamanetworkopen.2023.28136), 2023-08-15
Supplement: jamanetwopen-e2328136-s002.pdf [file jamanetwopen-e2328136-s002.pdf]

## Data Sharing Statement

Zhou. Efficacy and Safety in Proton Therapy and Photon Therapy for Patients With Esophageal Cancer. *JAMA Netw Open*. Published August 15, 2023.

doi:10.1001/jamanetworkopen.2023.28136

### Data

**Data available:** Yes

**Data types:** Deidentified participant data

**How to access data:** [zpx2019969@163.com](mailto:zpx2019969@163.com)

**When available:** With publication

### Supporting Documents

**Document types:** None

### Additional Information

**Who can access the data:** Researchers whose proposed use of the data has been approved

**Types of analyses:** For a specified purpose

**Mechanisms of data availability:** After approval of a proposal, or with a signed data access agreement

**Any additional restrictions:** None
